# Supplementary material
Source: publisher figshare collection journal article supplement (https://acs.figshare.com/ndownloader/files/28200187)
Supplement: Supplementary file 1 [file 28200187]

# **Total Synthesis of Penicibilaenes via C–C Activation-Enabled Skeleton Deconstruction and Desaturation Relay-Mediated C–H Functionalization**

Yibin Xue and Guangbin Dong\*

Department of chemistry, University of Chicago, Chicago, Illinois 60637, United States

## Table of Contents

|                                                                                    |     |
|------------------------------------------------------------------------------------|-----|
| 1. General Information.....                                                        | S3  |
| 2. Experimental Procedure and Characterization Data.....                           | S4  |
| 3. Comparison of the Spectroscopic Data of the Natural and Synthetic Products..... | S16 |
| 4. Optimization of Selected Reaction Conditions.....                               | S20 |
| 5. Gas Chromatography Data.....                                                    | S21 |
| 6. Preliminary Results of Substrate Scope.....                                     | S24 |
| 7. X-Ray Data.....                                                                 | S25 |
| 8. Spectra.....                                                                    | S27 |
| 9. References.....                                                                 | S49 |

## 1. General Information

Unless noted otherwise, all solvents were dried by filtration through a Pure-Solv MD-5 Solvent Purification System (Innovative Technology), all reactions were carried out under nitrogen atmosphere, all commercially available substrates were used without further purification. Thin layer chromatography (TLC) analysis was run on silica gel plates purchased from EMD Chemical (silica gel 60, F254). Infrared spectrum was recorded on a Nicolet iS5 FT-IR Spectrometer. Samples were scanned as neat liquids or dissolved in dichloromethane on potassium bromide (KBr) salt plates. Frequencies were reported in reciprocal centimeters ( $\text{cm}^{-1}$ ). High-resolution mass spectra (HRMS) were obtained on an Agilent 6224 TOF-MS spectrometer and were reported for the molecular ion  $[M]^+$ ,  $[M+\text{Na}]^+$ , or  $[M+\text{H}]^+$ . Nuclear magnetic resonance (NMR) spectrum ( $^1\text{H}$  NMR and  $^{13}\text{C}$  NMR) were recorded with a 400 MHz Bruker Avance-III-HD nanobay spectrometer equipped with a BBFO SmartProbe (400 MHz for  $^1\text{H}$ , 101 MHz for  $^{13}\text{C}$ ) or a 500 MHz Bruker Avance-III spectrometer equipped with a  $^1\text{H}$  ( $^{13}\text{C}$ ,  $^{31}\text{P}$ ) TXI probe (500 MHz for  $^1\text{H}$ , 126 MHz for  $^{13}\text{C}$ ). For  $\text{CDCl}_3$  solutions, the chemical shifts were reported as parts per million (ppm) referenced to residual protium or carbon of the solvents:  $\text{CHCl}_3$   $\delta$  H (7.26 ppm) and  $\text{CDCl}_3$   $\delta$  C (77.00 ppm). For acetone- $\text{D}_6$  solutions, the chemical shifts were reported as parts per million (ppm) referenced to residual protium or carbon of the solvents: acetone- $\text{D}_6$   $\delta$  H (2.05 ppm) and acetone- $\text{D}_6$   $\delta$  C (29.84 ppm). Coupling constants were reported in Hertz (Hz). Data for  $^1\text{H}$  NMR spectra were reported as following: chemical shift ( $\delta$ , ppm), multiplicity (br = broad, s = singlet, d = doublet, t = triplet, q = quartet, dd = doublet of doublets, td = triplet of doublets, ddd = doublet of doublet of doublets, m = multiplet), coupling constant (Hz), and integration.

## 2. Experimental Procedure and Characterization Data

### Synthesis of compound **S1**

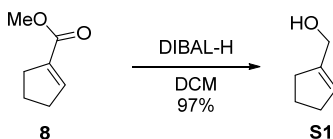

Following the literature reported procedure,<sup>1</sup> a flask containing dichloromethane (600 mL) was cooled to  $-78\text{ }^{\circ}\text{C}$ , then diisobutylaluminum hydride (DIBAL-H, 1M in hexane, 540 mL, 540 mmol) was added at  $-78\text{ }^{\circ}\text{C}$ . Compound **8** (31.13 g, 247 mmol) was then added slowly to the reaction mixture. After being stirred at  $-78\text{ }^{\circ}\text{C}$  for 2 h and  $0\text{ }^{\circ}\text{C}$  for 30 min, the reaction mixture was quenched with Rochelle salt (sat. in  $\text{H}_2\text{O}$ , 800 mL) and stirred at room temperature overnight. The mixture was extracted with dichloromethane ( $3 \times 300\text{ mL}$ ). The organic phase was dried with  $\text{Na}_2\text{SO}_4$  and concentrated under reduced pressure. The residue was purified by column chromatography (silica gel, hexane:ethyl acetate = 10:1) to give compound **S1** (23.59 g, 97% yield) as a colorless oil.

Spectra matched with literature report.<sup>1</sup>

### Synthesis of compound **10**

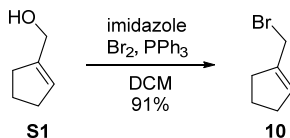

To a solution of  $\text{PPh}_3$  (52 g, 198 mmol) in dichloromethane (800 mL),  $\text{Br}_2$  was added (10.2 mL, 198 mmol) dropwise at  $0\text{ }^{\circ}\text{C}$ . Adding extra  $\text{PPh}_3$  may be necessary at this stage, until the reaction mixture becomes colorless. After this, imidazole (14.6 g, 214 mmol) and compound **S1** (16.2 g, 165 mmol) were added slowly to the reaction mixture at  $0\text{ }^{\circ}\text{C}$ . After being stirred at room temperature overnight, the reaction mixture was quenched with  $\text{Na}_2\text{SO}_3$  (sat. in  $\text{H}_2\text{O}$ , 400 mL) and extracted with dichloromethane ( $3 \times 300\text{ mL}$ ). The organic phase was dried with  $\text{Na}_2\text{SO}_4$  and concentrated under reduced pressure. The residue was purified by column chromatography (silica gel, pure pentane) to give bromide **10** (24.25 g, 91% yield) as a colorless oil.

Spectra matched with literature report.<sup>2</sup>

### Synthesis of compound **S2**

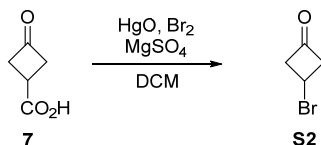

Following the literature reported procedure,<sup>3</sup> to a solution of compound **7** (5 g, 44 mmol) in dichloromethane (130 mL),  $\text{MgSO}_4$  (5.3 g, 44 mmol) and HgO (red, 14.3 g, 66 mmol) were added at room temperature, and the reaction mixture was then heated to reflux.  $\text{Br}_2$  (3.4 mL, 66 mmol) in dichloromethane (35 mL) was then added to the reaction mixture dropwise. After refluxing for 2 h, the reaction mixture was cooled to room temperature and filtered through Celite. The solvent was removed under reduced pressure to give crude compound **S2** (6.69 g) as a colorless oil. The crude compound **S2** was directly used in next step without further purification.

### Synthesis of compound **11**

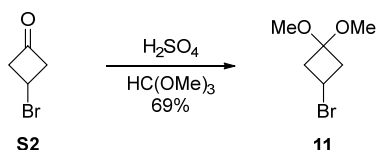

To a solution of compound **S2** (6.7 g, 44 mmol) in  $\text{HC}(\text{OMe})_3$  (15 mL, 135 mmol),  $\text{H}_2\text{SO}_4$  was added (0.47 mL, 8.8 mmol) at 0 °C. After stirring at room temperature for 3 h, the reaction mixture was diluted with dichloromethane (100 mL), quenched with 1M HCl (50 mL), and extracted with dichloromethane ( $3 \times 50$  mL). The organic phase was dried with  $\text{Na}_2\text{SO}_4$  and concentrated under reduced pressure. The residue was purified by column chromatography (silica gel, hexane:ethyl acetate = 10:1) to give bromide **11** (5.90 g, 69% yield for 2 steps) as a colorless oil.

$R_f$  = 0.70 (hexane:ethyl acetate = 4:1)

$^1\text{H}$  NMR (500 MHz,  $\text{CDCl}_3$ )  $\delta$  4.24 – 4.16 (m, 1H), 3.15 (s, 3H), 3.13 (s, 3H), 2.93 – 2.86 (m, 2H), 2.56 – 2.49 (m, 2H).

$^{13}\text{C}$  NMR (126 MHz,  $\text{CDCl}_3$ )  $\delta$  100.5, 48.9, 48.8, 44.9, 32.9.

IR (KBr)  $\nu_{\text{max}}$  = 2999, 2952, 2832, 1448, 1410, 1276, 1158, 1042, 859, 543  $\text{cm}^{-1}$

HRMS (CI)  $m/z$  calcd. for  $\text{C}_6\text{H}_{11}^{79}\text{BrO}_2^+ [\text{M}]^+$ : 193.9937, found 193.9980;  $m/z$  calcd. for  $\text{C}_6\text{H}_{11}^{81}\text{BrO}_2^+ [\text{M}]^+$ : 195.9917, found 195.9864

#### Synthesis of compound 6

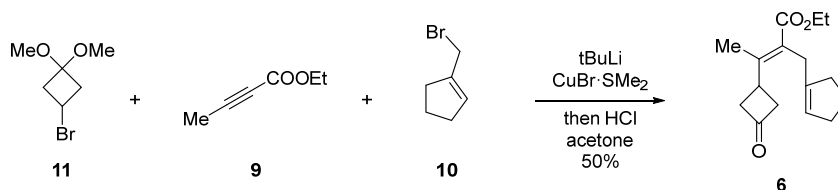

To a solution of compound **11** (3.9 g, 20 mmol) in  $\text{Et}_2\text{O}$  (20 mL),  $t\text{BuLi}$  was added (1.7 M in pentane, 25.6 mL, 41 mmol) at  $-78$  °C, and stirred at  $-78$  °C for 1 h. This alkyl lithium solution was added to a separate flask containing  $\text{CuBr} \cdot \text{SMe}_2$  (4.1 g, 20 mmol) in tetrahydrofuran (THF, 100 mL) at  $-78$  °C. After stirring at  $-78$  °C for 10 min, compound **9** (2.24 g, 20 mmol) was added to the reaction mixture and stirred at  $-78$  °C for an additional 30 min. Hexamethylphosphoramide (HMPA, 20 mL) and compound **10** (4.3 g, 22 mmol) were then added to the reaction mixture at  $-78$  °C. After stirring at 0 °C for 2 h, the reaction mixture was treated with HCl (2 M in  $\text{H}_2\text{O}$ , 40 mL) and acetone (100 mL). The reaction was then stirred at room temperature overnight and quenched with  $\text{NaHCO}_3$  (sat. in  $\text{H}_2\text{O}$ , 200 mL) and extracted with ethyl acetate ( $3 \times 100$  mL). The organic phase was washed with brine (sat. in  $\text{H}_2\text{O}$ ,  $3 \times 200$  mL), dried with  $\text{Na}_2\text{SO}_4$  and concentrated under reduced pressure. The residue was purified by column chromatography (silica gel, hexane:ethyl acetate = 20:1) to give compound **6** (2.65 g, 50% yield) as a colorless oil.

$R_f$  = 0.28 (hexane:ethyl acetate = 4:1)

$^1\text{H}$  NMR (500 MHz,  $\text{CDCl}_3$ )  $\delta$  5.30 (hept,  $J$  = 1.9 Hz, 1H), 4.20 (q,  $J$  = 7.1 Hz, 2H), 3.61 – 3.51 (m, 1H), 3.20 – 3.07 (m, 6H), 2.27 (tq,  $J$  = 7.2, 2.3 Hz, 2H), 2.24 – 2.19 (m, 2H), 2.01 (s, 3H), 1.86 (tt,  $J$  = 8.2, 6.7 Hz, 2H), 1.29 (t,  $J$  = 7.1 Hz, 3H).

$^{13}\text{C}$  NMR (101 MHz,  $\text{CDCl}_3$ )  $\delta$  206.0, 169.6, 143.1, 141.7, 128.7, 125.0, 60.4, 51.4, 35.2, 32.3, 31.6, 26.5, 23.4, 15.5, 14.2.

IR (KBr)  $\nu_{\text{max}}$  = 2932, 2846, 1789, 1710, 1446, 1381, 1289, 1214, 1189, 1101, 1064  $\text{cm}^{-1}$

HRMS (ESI)  $m/z$  calcd. for  $\text{C}_{16}\text{H}_{23}\text{O}_3^+ [\text{M}+\text{H}]^+$ : 263.1642, found 263.1610.

#### Synthesis of compound 5

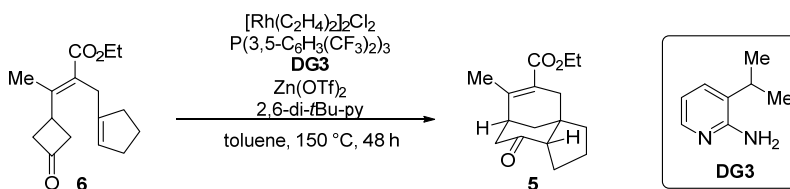

0.05 mmol scale procedure:

A flame dried 4 mL vial was charged with  $P(3,5\text{-C}_6\text{H}_3(\text{CF}_3)_2)_3$  (16.8 mg, 0.025 mmol), **DG3** (1.4 mg, 0.01 mmol) and  $\text{Zn}(\text{OTf})_2$  (18.2 mg, 0.05 mmol) in glove box. After adding a solution of compound **6** (13.1 mg, 0.05 mmol) and  $[\text{Rh}(\text{C}_2\text{H}_4)_2\text{Cl}]_2$  (1.9 mg, 0.005 mmol) dissolved in toluene (0.5 mL), the vial was sealed and removed from glovebox. The reaction was stirred at 150 °C in a pi-block for 48 h, before being cooled to room temperature. Then the solvent was removed under reduced pressure to give ketone **5** (48% GC yield, 1-methylnaphthalene as internal standard).

Gram-scale procedure:

A flame dried glass pressure vessel was charged with  $P(3,5\text{-C}_6\text{H}_3(\text{CF}_3)_2)_3$  (1.07 g, 1.6 mmol), **DG3** (109 mg, 0.8 mmol),  $\text{Zn}(\text{OTf})_2$  (290 mg, 0.8 mmol) and 2,6-di-*tert*-butylpyridine (380 mg, 2 mmol) in glove box. After adding a solution of compound **6** (1.05 g, 4 mmol) and  $[\text{Rh}(\text{C}_2\text{H}_4)_2\text{Cl}]_2$  (155 mg, 0.4 mmol) in toluene (40 mL), the vessel was sealed and removed from glovebox. The reaction was then stirred at 150 °C in oil bath for 48 h before being cooled to room temperature. The reaction mixture was quenched with  $\text{NH}_4\text{Cl}$  (sat. in  $\text{H}_2\text{O}$ , 50 mL) and extracted with ethyl acetate ( $3 \times 50$  mL). The organic phase was dried with  $\text{Na}_2\text{SO}_4$  and concentrated under reduced pressure. The residue was then purified by column chromatography (silica gel, hexane:ethyl acetate = 20:1 to 10:1) to give compound **5** (0.87 g, combining 2 parallel reactions, 42% yield) as a colorless oil.

$R_f$  = 0.40 (hexane:ethyl acetate = 2:1)

**$^1\text{H}$  NMR** (500 MHz,  $\text{CDCl}_3$ )  $\delta$  4.15 (q,  $J$  = 7.1 Hz, 2H), 2.60 (dt,  $J$  = 4.0, 1.9 Hz, 1H), 2.56 (dd,  $J$  = 16.0, 5.6 Hz, 1H), 2.46 (dt,  $J$  = 17.6, 2.1 Hz, 1H), 2.36 (ddt,  $J$  = 16.0, 3.3, 1.6 Hz, 1H), 2.29 – 2.20 (m, 2H), 2.01 (t,  $J$  = 2.0 Hz, 3H), 1.98 (dq,  $J$  = 8.8, 5.2, 4.3 Hz, 1H), 1.91 – 1.80 (m, 3H), 1.78 – 1.72 (m, 1H), 1.64 – 1.59 (m, 3H), 1.27 (t,  $J$  = 7.1 Hz, 3H).

**$^{13}\text{C}$  NMR** (101 MHz,  $\text{CDCl}_3$ )  $\delta$  213.1, 168.1, 147.5, 124.5, 60.2, 59.8, 44.4, 40.6, 40.25, 40.20, 39.7, 32.8, 29.6, 22.3, 20.4, 14.2.

**IR (KBr)**  $\nu_{\text{max}}$  = 2934, 1708, 1448, 1371, 1238, 1208, 1094, 1056  $\text{cm}^{-1}$

**HRMS (ESI)**  $m/z$  calcd. for  $\text{C}_{16}\text{H}_{23}\text{O}_3^+$   $[\text{M}+\text{H}]^+$ : 263.1642, found 263.1643;  $\text{C}_{16}\text{H}_{22}\text{NaO}_3^+$   $[\text{M}+\text{Na}]^+$ : 285.1461, found 285.1460.

*Synthesis of compound 12*

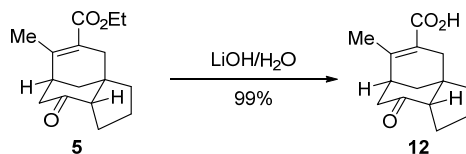

To a solution of compound **5** (320 mg, 1.22 mmol) in tetrahydrofuran (THF, 7.2 mL),  $\text{LiOH} \cdot \text{H}_2\text{O}$  (160 mg, 3.7 mmol), water (2.4 mL) and methanol (2.4 mL) were added at room temperature. After stirring at 70 °C overnight, the reaction mixture was extracted with  $\text{Et}_2\text{O}$  (5 mL). The organic phase was discarded and to the aqueous phase 1M  $\text{HCl}$  was added until  $\text{pH} = 1$  and extracted with dichloromethane ( $3 \times 10$  mL). The organic phase was dried with  $\text{Na}_2\text{SO}_4$  and concentrated under reduced pressure to give crude compound **12** (283.3 mg, 99% yield) as a white solid. The crude compound **12** was directly used in next step without further purification.

$R_f$  = 0.42 (pure ethyl acetate)

**<sup>1</sup>H NMR** (500 MHz, CDCl<sub>3</sub>) δ 2.66 (dq, *J* = 4.0, 1.9 Hz, 1H), 2.59 (dd, *J* = 16.2, 5.7 Hz, 1H), 2.48 (dt, *J* = 17.8, 2.0 Hz, 1H), 2.38 (dq, *J* = 16.1, 2.0 Hz, 1H), 2.31 – 2.23 (m, 2H), 2.10 (t, *J* = 2.0 Hz, 3H), 1.99 (ddt, *J* = 13.2, 8.6, 4.6 Hz, 1H), 1.93 – 1.80 (m, 3H), 1.80 – 1.73 (m, 1H), 1.64 (dd, *J* = 7.5, 5.2 Hz, 3H).

**<sup>13</sup>C NMR** (101 MHz, CDCl<sub>3</sub>) δ 213.0, 173.3, 151.9, 123.4, 59.7, 44.3, 40.8, 40.6, 40.0, 39.7, 32.6, 29.5, 22.3, 20.9.

**IR (KBr)**  $\nu_{\text{max}}$  = 2932, 2626, 1704, 1629, 1449, 1415, 1273, 917, 732 cm<sup>-1</sup>

**HRMS (ESI)** *m/z* calcd. for C<sub>14</sub>H<sub>19</sub>O<sub>3</sub><sup>+</sup> [M+H]<sup>+</sup>: 235.1329, found 263.1330; C<sub>14</sub>H<sub>18</sub>NaO<sub>3</sub><sup>+</sup> [M+Na]<sup>+</sup>: 257.1148, found 257.1150.

**Melting point:** 109.8 – 111.8 °C

#### Synthesis of compound **4**

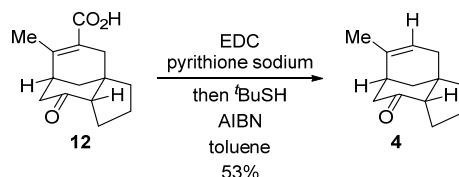

To a solution of compound **12** (66 mg, 0.28 mmol) in dichloromethane (2.8 mL), pyridine sodium (51 mg, 0.34 mmol) and *N*-(3-Dimethylaminopropyl)-*N*'-ethylcarbodiimide hydrochloride (EDC, 65 mg, 0.34 mmol) were added at room temperature. After stirring at room temperature for 2 h, the reaction mixture was concentrated under reduced pressure. To the residue, toluene (5.6 mL), 2,2'-azobis(2-methylpropionitrile) (AIBN, 4.6 mg, 0.028 mmol), and *t*-BuSH (0.32 mL, 2.8 mmol) were added at room temperature. The solution was then bubbled with nitrogen gas for 20 min. Then, after stirring at 75 °C for 1 h, the resulting mixture was concentrated under reduced pressure. The residue was purified by column chromatography (silica gel, hexane:ethyl acetate = 20:1) to give compound **4** (28.4 mg, 53% yield) as a white solid.

**R<sub>f</sub>** = 0.56 (hexane:ethyl acetate = 4:1)

**<sup>1</sup>H NMR** (500 MHz, CDCl<sub>3</sub>) δ 5.36 (dt, *J* = 4.9, 1.9 Hz, 1H), 2.51 (dd, *J* = 15.6, 5.0 Hz, 1H), 2.44 (t, *J* = 3.5 Hz, 1H), 2.33 – 2.24 (m, 2H), 2.20 (t, *J* = 9.6 Hz, 1H), 2.01 – 1.92 (m, 1H), 1.91 – 1.86 (m, 2H), 1.85 – 1.69 (m, 3H), 1.64 (dt, *J* = 2.8, 1.5 Hz, 3H), 1.63 – 1.56 (m, 2H), 1.52 (ddd, *J* = 12.9, 9.9, 8.1 Hz, 1H).

**<sup>13</sup>C NMR** (101 MHz, CDCl<sub>3</sub>) δ 214.3, 136.5, 121.6, 60.5, 44.9, 40.5, 39.6, 39.3, 37.2, 33.5, 29.6, 22.4, 21.5.

**IR (KBr)**  $\nu_{\text{max}}$  = 2957, 2928, 2828, 1704, 1447, 1327, 1232, 1037, 931, 807 cm<sup>-1</sup>

**HRMS (ESI)** *m/z* calcd. for C<sub>13</sub>H<sub>19</sub>O<sup>+</sup> [M+H]<sup>+</sup>: 191.1430, found 191.1430.

**Melting point:** 45.0 – 46.2 °C

#### Synthesis of compound **S3**

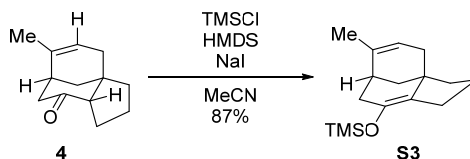

To a solution of compound **4** (50 mg, 0.26 mmol) in acetonitrile (2.6 mL), hexamethyldisilazane (HMDS, 0.22 mL, 1.05 mmol), NaI (157 mg, 1.05 mmol), and chlorotrimethylsilane (TMSCl, 99 μL, 0.78 mmol) were added at room temperature. After stirring at room temperature for 12 h, the reaction mixture was quenched with pH = 7 buffer (aqueous, 5 mL) and extracted with Et<sub>2</sub>O (3 × 5 mL). The organic phase was then dried with Na<sub>2</sub>SO<sub>4</sub> and concentrated under reduced pressure, then purified by column chromatography (silica gel, hexane:Et<sub>2</sub>O = 20:1) to give compound **S3** (59.3 mg, 87% yield) as a colorless oil.

**R<sub>f</sub>** = 0.77 (hexane:ethyl acetate = 10:1)

**<sup>1</sup>H NMR** (500 MHz, CDCl<sub>3</sub>) δ 5.24 (t, *J* = 3.9 Hz, 1H), 2.40 – 2.29 (m, 2H), 2.27 – 2.15 (m, 2H), 1.99 – 1.88 (m, 2H), 1.85 (d, *J* = 17.4 Hz, 1H), 1.79 (dd, *J* = 11.5, 3.9 Hz, 1H), 1.75 – 1.70 (m, 1H), 1.69 – 1.66 (m, 4H), 1.66 – 1.61 (m, 1H), 1.44 – 1.34 (m, 1H), 1.31 – 1.26 (m, 1H), 0.13 (s, 9H).  
**<sup>13</sup>C NMR** (101 MHz, CDCl<sub>3</sub>) δ 140.6, 136.6, 124.3, 120.0, 40.8, 40.6, 37.5, 36.3, 36.2, 34.3, 25.4, 22.0, 21.8, 0.7.  
**IR (KBr)**  $\nu_{\text{max}}$  = 2955, 2913, 1699, 1348, 1251, 1209, 1165, 1004, 873, 842 cm<sup>-1</sup>  
**HRMS (ESI)** *m/z* calcd. for C<sub>13</sub>H<sub>17</sub>O<sup>+</sup> [M+H]<sup>+</sup>: 189.1274, found 189.1280.

#### Synthesis of compound **14**

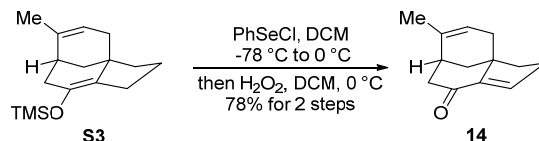

To a solution of compound **S3** (20 mg, 0.076 mmol) in dichloromethane (1.5 mL), PhSeCl (21 mg, 0.11 mmol) was added at –78 °C. After stirring at –78 °C for 30 min, the reaction mixture was warmed to 0 °C and stirred for 5 min. The reaction was then quenched with NaHCO<sub>3</sub> (sat. in H<sub>2</sub>O, 2 mL) and extracted with dichloromethane (3 × 2 mL). The organic phase was dried with Na<sub>2</sub>SO<sub>4</sub> and concentrated under reduced pressure. The residue was added dichloromethane (1.5 mL) and H<sub>2</sub>O<sub>2</sub> (30% in H<sub>2</sub>O, 40 μL, 0.38 mmol) at the 0 °C. After stirring at 0 °C for 1 h, the reaction was quenched with Na<sub>2</sub>S<sub>2</sub>O<sub>3</sub> (sat. in H<sub>2</sub>O, 2 mL) and extracted with dichloromethane (3 × 2 mL). The organic phase was dried with Na<sub>2</sub>SO<sub>4</sub> and concentrated under reduced pressure. The residue was purified by column chromatography (silica gel, hexane:Et<sub>2</sub>O = 20:1) to give compound **14** (11.2 mg, 78% yield) as a colorless oil.

**R<sub>f</sub>** = 0.46 (hexane:ethyl acetate = 4:1)

**<sup>1</sup>H NMR** (500 MHz, CDCl<sub>3</sub>) δ 6.56 (t, *J* = 2.9 Hz, 1H), 5.35 – 5.27 (m, 1H), 2.60 – 2.48 (m, 2H), 2.46 (t, *J* = 3.5 Hz, 1H), 2.43 – 2.33 (m, 2H), 2.19 (dt, *J* = 17.5, 3.0 Hz, 1H), 2.10 (dt, *J* = 15.4, 3.1 Hz, 2H), 1.99 – 1.87 (m, 2H), 1.78 – 1.72 (m, 1H), 1.67 (d, *J* = 2.4 Hz, 3H).

**<sup>13</sup>C NMR** (101 MHz, CDCl<sub>3</sub>) δ 199.1, 149.4, 137.7, 136.5, 120.7, 46.3, 44.2, 41.0, 39.0, 38.1, 36.9, 29.9, 21.5.

**IR (KBr)**  $\nu_{\text{max}}$  = 2921, 1683, 1612, 1436, 1328, 1261, 1221, 1048, 986, 919 cm<sup>-1</sup>

**HRMS (CI)** *m/z* calcd. for C<sub>16</sub>H<sub>27</sub>OSi<sup>+</sup> [M+H]<sup>+</sup>: 263.1826, found 263.1826.

#### Synthesis of compound **14** (one step from compound **4**)

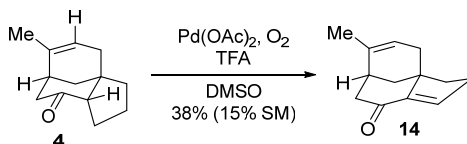

To a solution of compound **4** (49 mg, 0.26 mmol) in dimethyl sulfoxide (DMSO, 1.3 mL), trifluoroacetic acid (TFA, 20 μL, 0.26 mmol) and Pd(OAc)<sub>2</sub> (17 mg, 0.077 mmol) were added at room temperature. The solution was then bubbled with O<sub>2</sub> for 20 min. After stirring at 60 °C under O<sub>2</sub> atmosphere for 24 h, the reaction was quenched with NaHCO<sub>3</sub> (sat. in H<sub>2</sub>O, 3 mL) and extracted with Et<sub>2</sub>O (3 × 3 mL). The organic phase was dried with Na<sub>2</sub>SO<sub>4</sub> and concentrated under reduced pressure. The residue was then purified by column chromatography (silica gel, hexane:Et<sub>2</sub>O = 100:1) to give compound **14** (18.4 mg, 38% yield) and compound **4** (7.4 mg, 15% recovery).

#### Synthesis of compound **13**

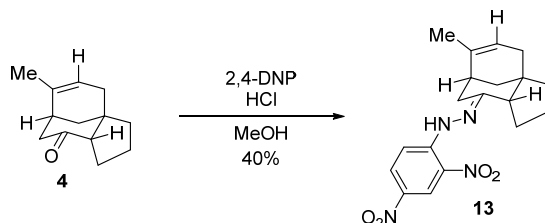



To a solution of compound **4** (8.1 mg, 0.043 mmol) in methanol (0.5 mL), 2,4-dinitrophenylhydrazine (2,4-DNP, 8.5 mg, 0.043 mmol) and HCl (conc. in H<sub>2</sub>O, 2.6  $\mu$ L, 0.043 mmol) were added at room temperature. After stirring at room temperature overnight, the reaction was quenched with NaHCO<sub>3</sub> (sat. in H<sub>2</sub>O, 1 mL) and extracted with dichloromethane (3  $\times$  1 mL). The organic phase was dried with Na<sub>2</sub>SO<sub>4</sub> and concentrated under reduced pressure. The residue was purified by column chromatography (silica gel, hexane:ethyl acetate = 20:1) to give compound **13** (6.3 mg, 40% yield) as an orange solid.

**R<sub>f</sub>** = 0.61 (hexane:ethyl acetate = 4:1)

**<sup>1</sup>H NMR** (500 MHz, CDCl<sub>3</sub>)  $\delta$  11.19 (s, 1H), 9.11 (d,  $J$  = 2.5 Hz, 1H), 8.27 (dd,  $J$  = 9.6, 2.6 Hz, 1H), 7.93 (d,  $J$  = 9.6 Hz, 1H), 5.39 (s, 1H), 2.77 (d,  $J$  = 15.3 Hz, 1H), 2.48 (t,  $J$  = 9.2 Hz, 2H), 2.36 – 2.23 (m, 2H), 2.00 – 1.88 (m, 2H), 1.88 – 1.79 (m, 3H), 1.79 – 1.74 (m, 1H), 1.66 (s, 3H), 1.62 – 1.56 (m, 3H).

**<sup>13</sup>C NMR** (101 MHz, CDCl<sub>3</sub>)  $\delta$  162.7, 145.3, 137.4, 135.2, 129.8, 128.7, 123.6, 122.5, 116.5, 54.6, 42.9, 39.8, 38.9, 36.6, 33.4, 31.3, 26.9, 21.74, 21.72.

**IR (KBr)**  $\nu_{\text{max}}$  = 3321, 2928, 1619, 1591, 1518, 1426, 1336, 1136, 1074, 916, 831, 743 cm<sup>-1</sup>

**HRMS (ESI)**  $m/z$  calcd. for C<sub>19</sub>H<sub>23</sub>N<sub>4</sub>O<sub>4</sub><sup>+</sup> [M+H]<sup>+</sup>: 371.1714, found 371.1716.

**Melting point:** 140.7 – 141.4 °C

#### Synthesis of compound **15**

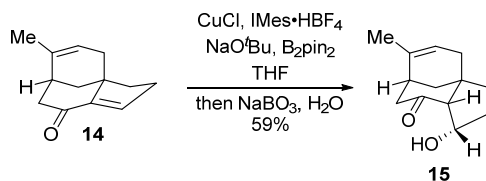

To a suspension of CuCl (0.5 mg, 0.0054 mmol) in tetrahydrofuran (THF, 0.25 mL), 1,3-Bis(2,4,6-trimethylphenyl)imidazolium tetrafluoroborate (IMes·HBF<sub>4</sub>, 2 mg, 0.0054 mmol), and NaO<sup>t</sup>Bu (1 mg, 0.0108 mmol) were added at room temperature. After stirring at room temperature for 40 min, a solution containing compound **14** (5 mg, 0.027 mmol) and bis(pinacolato)diboron (B<sub>2</sub>(pin)<sub>2</sub>, 9 mg, 0.035 mmol) in tetrahydrofuran (THF, 0.25 mL) was added to the reaction mixture. After stirring at 0 °C for 2 h and room temperature for 1 h, 0.5 mL H<sub>2</sub>O and NaBO<sub>3</sub>·4H<sub>2</sub>O (12.5 mg, 0.081 mmol) were added to the reaction mixture and stirred at room temperature for 3 h. The reaction was then quenched with Na<sub>2</sub>S<sub>2</sub>O<sub>3</sub> (sat. in H<sub>2</sub>O, 1 mL) and extracted with ethyl acetate (3  $\times$  2 mL), and the organic phase was dried with Na<sub>2</sub>SO<sub>4</sub> and concentrated under reduced pressure. The residue was purified by column chromatography (silica gel, hexane:Et<sub>2</sub>O = 4:1) to give compound **15** (3.3 mg, 59% yield) as a colorless oil.

**R<sub>f</sub>** = 0.52 (hexane:ethyl acetate = 2:1)

**<sup>1</sup>H NMR** (500 MHz, CDCl<sub>3</sub>)  $\delta$  5.34 (dt,  $J$  = 5.1, 1.8 Hz, 1H), 4.60 (tt,  $J$  = 6.3, 3.2 Hz, 1H), 2.49 (dtd,  $J$  = 16.8, 2.2, 1.3 Hz, 1H), 2.43 (ddq,  $J$  = 6.1, 4.0, 2.0 Hz, 1H), 2.36 (dd,  $J$  = 16.9, 5.4 Hz, 1H), 2.27 (d,  $J$  = 3.6 Hz, 1H), 2.26 – 2.19 (m, 2H), 2.05 – 1.97 (m, 2H), 1.89 – 1.76 (m, 4H), 1.65 (dt,  $J$  = 2.8, 1.5 Hz, 3H), 1.59 – 1.54 (m, 1H).

**<sup>13</sup>C NMR** (101 MHz, CDCl<sub>3</sub>)  $\delta$  214.7, 137.5, 121.1, 76.1, 64.8, 44.9, 41.7, 41.2, 38.0, 36.0, 35.7, 33.0, 21.5.

**IR (KBr)**  $\nu_{\text{max}}$  = 3432, 2912, 2828, 1692, 1445, 1330, 1220, 1112, 1039, 808, 564 cm<sup>-1</sup>

**HRMS (ESI):**  $m/z$  calcd for C<sub>13</sub>H<sub>19</sub>O<sub>2</sub><sup>+</sup> [M+H]<sup>+</sup>: 207.1380, found 207.1379.

#### Synthesis of compound **16**

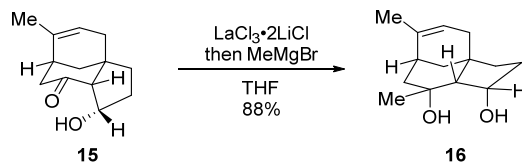

To a solution of compound **15** (0.234 g, 1.13 mmol) in tetrahydrofuran (THF, 12 mL),  $\text{LaCl}_3 \cdot \text{LiCl}$  (0.5 M in THF, 2.5 mL, 1.25 mmol) was added at 0 °C. After stirring at 0 °C for 1 h,  $\text{MeMgBr}$  (3M in  $\text{Et}_2\text{O}$ , 0.83 mL, 2.49 mmol) was added to the reaction mixture at 0 °C. After stirring at 0 °C for 30 min, the reaction was quenched with  $\text{NH}_4\text{Cl}$  (sat. in  $\text{H}_2\text{O}$ , 10 mL).  $\text{HCl}$  (2M in water) was then added to the reaction mixture until all precipitate dissolved, and the resulting mixture was extracted with ethyl acetate ( $3 \times 10$  mL). The organic phase was washed with  $\text{NaHCO}_3$  (sat. in  $\text{H}_2\text{O}$ , 30 mL) and brine (sat. in  $\text{H}_2\text{O}$ , 30 mL), dried with  $\text{Na}_2\text{SO}_4$  and concentrated under reduced pressure. The residue was purified by column chromatography (silica gel, hexane: $\text{Et}_2\text{O}$  = 4:1) to give compound **16** (0.2202 g, 88% yield) as a white solid.

$R_f$  = 0.36 (hexane:ethyl acetate = 2:1)

$^1\text{H}$  NMR (500 MHz,  $\text{CDCl}_3$ )  $\delta$  5.27 (tt,  $J$  = 2.8, 1.4 Hz, 1H), 4.63 (td,  $J$  = 6.6, 3.3 Hz, 1H), 3.02 (d,  $J$  = 2.4 Hz, 1H), 2.81 (s, 1H), 2.25 (dd,  $J$  = 6.3, 2.9 Hz, 1H), 2.16 – 2.07 (m, 2H), 2.06 – 1.99 (m, 1H), 1.86 (dd,  $J$  = 13.6, 6.4 Hz, 1H), 1.75 – 1.69 (m, 3H), 1.67 (q,  $J$  = 1.9 Hz, 3H), 1.63 (d,  $J$  = 13.3 Hz, 1H), 1.54 (dd,  $J$  = 6.5, 1.3 Hz, 1H), 1.48 – 1.42 (m, 1H), 1.38 (s, 3H), 1.36 (dt,  $J$  = 3.2, 1.4 Hz, 1H).

$^{13}\text{C}$  NMR (101 MHz,  $\text{CDCl}_3$ )  $\delta$  139.0, 121.1, 76.9, 73.2, 59.4, 41.6, 40.4, 40.3, 39.3, 35.7, 33.2, 33.1, 32.4, 21.9.

IR (KBr)  $\nu_{\text{max}}$  = 3320, 2958, 2929, 2870, 1440, 1370, 1166, 1137, 1094, 1061, 1019, 920, 799  $\text{cm}^{-1}$

HRMS (ESI):  $m/z$  calcd for  $\text{C}_{14}\text{H}_{22}\text{NaO}_2^+$  [ $\text{M}+\text{Na}$ ] $^+$ : 245.1512, found 245.1518.

Melting point: 88.3 – 89.6 °C

#### Synthesis of compound **3**

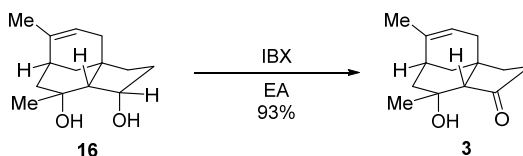

To a solution of compound **16** (100 mg, 0.45 mmol) in ethyl acetate (9 mL), 2-iodoxybenzoic acid (IBX, 378 mg, 1.35 mmol) was added at room temperature. After stirring at 80 °C for 3 h, the reaction mixture was filtered through a short pad of silica gel and concentrated under reduced pressure. The residue was purified by column chromatography (silica gel, hexane: $\text{Et}_2\text{O}$  = 4:1) to give compound **3** (92.4 mg, 93% yield) as a white solid.

$R_f$  = 0.40 (hexane:ethyl acetate = 2:1)

$^1\text{H}$  NMR (500 MHz,  $\text{CDCl}_3$ )  $\delta$  5.64 (d,  $J$  = 1.7 Hz, 1H), 5.37 (ddd,  $J$  = 4.4, 2.8, 1.5 Hz, 1H), 2.42 – 2.31 (m, 2H), 2.31 – 2.23 (m, 2H), 2.11 – 2.03 (m, 2H), 1.83 – 1.78 (m, 1H), 1.78 – 1.66 (m, 5H), 1.57 (d,  $J$  = 5.0 Hz, 1H), 1.44 – 1.35 (m, 2H), 1.31 (s, 3H).

$^{13}\text{C}$  NMR (101 MHz,  $\text{CDCl}_3$ )  $\delta$  222.7, 138.6, 121.6, 71.6, 64.2, 40.03, 39.97, 38.8, 35.8, 35.1, 33.5, 32.9, 30.8, 22.0.

IR (KBr)  $\nu_{\text{max}}$  = 3444, 2922, 2867, 1704, 1439, 1406, 1367, 1154, 1137, 1040, 919, 895, 803  $\text{cm}^{-1}$

HRMS (ESI):  $m/z$  calcd for  $\text{C}_{14}\text{H}_{21}\text{O}_2^+$  [ $\text{M}+\text{H}$ ] $^+$ : 221.1536, found 221.1532.

Melting point: 117.6 – 118.7 °C

#### Synthesis of compound **17**

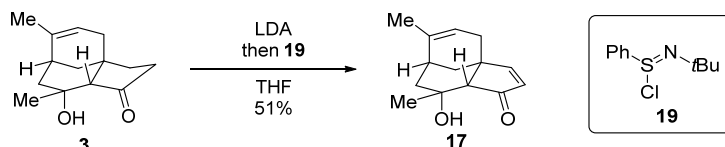

To a solution of diisopropyl amine (7.4  $\mu\text{L}$ , 0.053 mmol) in tetrahydrofuran (THF, 0.1 mL),  $n\text{-BuLi}$  (2.5 M in THF, 20  $\mu\text{L}$ , 0.051 mmol) was added at 0 °C and stirred for 1 h. This lithium diisopropylamide (LDA) solution was then added to another flask containing compound **3** (5 mg, 0.023 mmol) in tetrahydrofuran (THF, 0.1 mL) at –78 °C. After stirring at –78 °C for 30 min, freshly prepared compound **19** (1M in benzene, 35  $\mu\text{L}$ , 0.035 mmol) was added to the reaction mixture.<sup>4</sup> After stirring at –78 °C for 30 min, the reaction was quenched with  $\text{NH}_4\text{Cl}$  (sat. in  $\text{H}_2\text{O}$ , 1

mL) and extracted with ethyl acetate (3 × 1 mL). The organic phase was dried with Na<sub>2</sub>SO<sub>4</sub> and concentrated under reduced pressure. The residue was then purified by column chromatography (silica gel, hexane:ethyl acetate = 10:1) to give compound **17** (51% NMR yield) as a white solid.

**R<sub>f</sub>** = 0.41 (hexane:ethyl acetate = 2:1)

**<sup>1</sup>H NMR** (500 MHz, CDCl<sub>3</sub>) δ 7.56 (d, *J* = 5.7 Hz, 1H), 6.13 (d, *J* = 5.6 Hz, 1H), 5.31 (dt, *J* = 4.9, 1.7 Hz, 1H), 2.35 – 2.25 (m, 2H), 2.21 (dt, *J* = 11.9, 2.2 Hz, 1H), 1.96 (dd, *J* = 14.9, 9.7 Hz, 1H), 1.92 (s, 1H), 1.69 (dt, *J* = 2.6, 1.5 Hz, 3H), 1.62 – 1.59 (m, 1H), 1.59 – 1.56 (m, 1H), 1.55 (s, 3H), 1.55 – 1.52 (m, 1H), 1.32 (s, 1H).

**<sup>13</sup>C NMR** (101 MHz, CDCl<sub>3</sub>) δ 211.2, 172.4, 141.0, 132.8, 118.6, 71.8, 59.1, 44.0, 42.4, 39.5, 32.8, 31.0, 28.9, 22.1.

**IR (KBr)**  $\nu_{\text{max}}$  = 3432, 2961, 2921, 1698, 1675, 1584, 1443, 1384, 1125, 934, 804 cm<sup>-1</sup>

**HRMS (ESI)**: *m/z* calcd for C<sub>14</sub>H<sub>19</sub>O<sub>2</sub><sup>+</sup> [*M*+*H*]<sup>+</sup>: 219.1380, found 219.1374.

**Melting point**: 146.0 – 146.6 °C

#### Synthesis of compound **18**

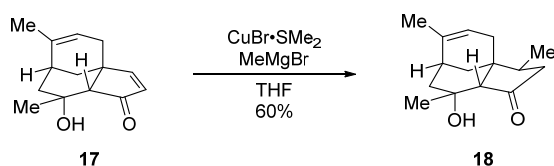

To a solution of compound **17** (4.5 mg, 0.021 mmol) in tetrahydrofuran (THF, 0.4 mL), CuBr·SMe<sub>2</sub> (8.6 mg, 0.042 mmol) was added at room temperature. The mixture was then cooled to -78 °C and MeMgBr (3 M in Et<sub>2</sub>O, 15 μL, 0.044 mmol) was added. After stirring at -78 °C for 1 h and 0 °C for 10 min, the reaction was quenched with NH<sub>4</sub>Cl (sat. in H<sub>2</sub>O, 1 mL) and extracted with ethyl acetate (3 × 1 mL). The organic phase was dried with Na<sub>2</sub>SO<sub>4</sub> and concentrated under reduced pressure. The residue was then purified by column chromatography (silica gel, hexane:ethyl acetate = 10:1) to give compound **18** (2.9 mg, 60% yield) as a white solid.

**R<sub>f</sub>** = 0.58 (hexane:ethyl acetate = 2:1)

**<sup>1</sup>H NMR** (500 MHz, CDCl<sub>3</sub>) δ 5.38 (ddq, *J* = 4.3, 3.0, 1.5 Hz, 1H), 5.12 (d, *J* = 1.2 Hz, 1H), 2.61 (dd, *J* = 19.3, 8.3 Hz, 1H), 2.31 – 2.25 (m, 1H), 2.24 (s, 1H), 2.22 (dd, *J* = 5.7, 2.9 Hz, 1H), 2.06 – 1.93 (m, 3H), 1.82 – 1.74 (m, 1H), 1.69 (q, *J* = 1.9 Hz, 3H), 1.66 – 1.62 (m, 1H), 1.45 (dt, *J* = 3.1, 1.4 Hz, 2H), 1.33 (t, *J* = 0.8 Hz, 3H), 1.07 (d, *J* = 7.1 Hz, 3H).

**<sup>13</sup>C NMR** (101 MHz, CDCl<sub>3</sub>) δ 222.6, 138.5, 121.4, 71.5, 59.8, 44.5, 41.7, 40.7, 37.2, 35.7, 34.9, 30.8, 21.9, 15.7.

**IR (KBr)**  $\nu_{\text{max}}$  = 3454, 2959, 2924, 1719, 1444, 1409, 1377, 1232, 1197, 1133, 1092, 899 cm<sup>-1</sup>

**HRMS (CI)**: *m/z* calcd for C<sub>15</sub>H<sub>23</sub>O<sub>2</sub><sup>+</sup> [*M*+*H*]<sup>+</sup>: 235.1693, found 235.1690.

**Melting point**: 85.4 – 86.5 °C

#### Synthesis of compound **1**

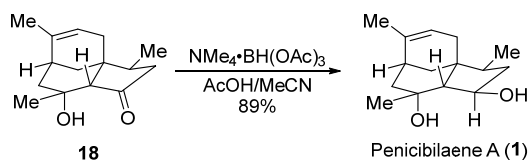

To a solution of compound **18** (6.7 mg, 0.029 mmol) in acetonitrile (0.3 mL) and acetic acid (0.3 mL), NMe<sub>4</sub>·NH(OAc)<sub>3</sub> (23 mg, 0.086 mmol) was added at room temperature. After stirring at room temperature for 2 h, the reaction was quenched with NaHCO<sub>3</sub> (sat. in H<sub>2</sub>O, 2 mL) and extracted with ethyl acetate (3 × 2 mL). The organic phase was dried with Na<sub>2</sub>SO<sub>4</sub> and concentrated under reduced pressure. The residue was purified by column chromatography (silica gel, hexane:ethyl acetate = 4:1) to give compound **1** (6.0 mg, 89% yield) as a white solid.

**R<sub>f</sub>** = 0.26 (hexane:ethyl acetate = 1:1)

**<sup>1</sup>H NMR** (500 MHz, Acetone-D<sub>6</sub>) δ 5.23 (d, *J* = 4.9 Hz, 1H), 4.45 (p, *J* = 6.9 Hz, 1H), 3.41 (d, *J* = 5.3 Hz, 1H), 3.21 (s, 1H), 2.15 (d, *J* = 8.5 Hz, 1H), 2.10 – 2.04 (m, 3H), 2.04 – 1.97 (m, 2H), 1.93 – 1.86 (m, 1H), 1.90 – 1.83 (m, 2H), 1.78 – 1.70 (m, 1H), 1.73 – 1.65 (m, 2H), 1.63 (d, *J* = 2.0 Hz, 3H), 1.50 (d, *J* = 14.2 Hz, 1H), 1.46 (d, *J* = 6.2 Hz, 1H), 1.38 (td, *J* = 11.8, 8.6 Hz, 1H), 1.30 (ddd, *J* = 11.6, 4.0, 1.4 Hz, 1H), 1.26 (s, 3H), 0.89 (d, *J* = 7.0 Hz, 3H).  
**<sup>13</sup>C NMR** (101 MHz, Acetone-D<sub>6</sub>) δ 140.9, 120.7, 73.4, 71.3, 61.5, 42.6, 42.54, 42.48, 42.4, 36.0, 35.4, 33.3, 31.4, 22.2, 15.0.

**IR (KBr)**  $\nu_{\max}$  = 3359, 3300, 2963, 1913, 1443, 1411, 1142, 1113, 1036, 922, 861 cm<sup>-1</sup>

**HRMS (ESI):** *m/z* calcd for C<sub>15</sub>H<sub>25</sub>O<sub>2</sub><sup>+</sup> [*M*+H]<sup>+</sup>: 237.1849, found 237.1842.

**Melting point:** 159.3 – 160.0 °C

#### Synthesis of compound **2**

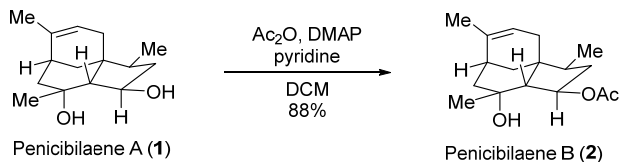

To a solution of compound **1** (6.0 mg, 0.025 mmol) in dichloromethane (0.5 mL), pyridine (6.1 μL, 0.075 mmol), acetic anhydride (Ac<sub>2</sub>O, 4.7 μL, 0.051 mmol), and 4-(dimethylamino)pyridine (DMAP, 0.3 mg, 0.0025 mmol) were added at room temperature. After stirring at room temperature for 24 h, the reaction was quenched with NH<sub>4</sub>Cl (sat. in H<sub>2</sub>O, 1 mL) and extracted with dichloromethane (3 × 2 mL). The organic phase was dried with Na<sub>2</sub>SO<sub>4</sub> and concentrated under reduced pressure. The residue was then purified by column chromatography (silica gel, hexane:ethyl acetate = 10:1) to give compound **2** (6.2 mg, 88% yield) as a white solid.

**R<sub>f</sub>** = 0.76 (hexane:ethyl acetate = 1:1)

**<sup>1</sup>H NMR** (500 MHz, CDCl<sub>3</sub>) δ 5.36 (ddd, *J* = 8.7, 7.6, 6.0 Hz, 1H), 5.26 (d, *J* = 4.9 Hz, 1H), 2.31 (ddd, *J* = 12.8, 7.5, 5.8 Hz, 1H), 2.22 (d, *J* = 9.2 Hz, 1H), 2.05 (d, *J* = 17.0 Hz, 1H), 2.00 (s, 3H), 1.83 (dd, *J* = 14.7, 9.1 Hz, 1H), 1.79 – 1.76 (m, 1H), 1.75 – 1.74 (m, 1H), 1.72 (d, *J* = 6.1 Hz, 1H), 1.72 – 1.68 (m, 1H), 1.65 (dt, *J* = 2.7, 1.5 Hz, 3H), 1.53 (dt, *J* = 14.6, 1.3 Hz, 1H), 1.44 (ddd, *J* = 11.8, 3.9, 1.5 Hz, 1H), 1.37 (td, *J* = 12.4, 8.7 Hz, 1H), 1.15 (s, 3H), 1.13 (s, 1H), 0.91 (d, *J* = 6.9 Hz, 3H).

**<sup>13</sup>C NMR** (101 MHz, CDCl<sub>3</sub>) δ 170.9, 140.3, 119.4, 75.5, 71.1, 56.8, 41.8, 41.7, 41.2, 38.3, 34.4, 34.2, 31.9, 30.3, 21.8, 21.4, 13.9.

**IR (KBr)**  $\nu_{\max}$  = 3505, 2958, 2926, 2886, 1736, 1719, 1458, 1375, 1271, 1245, 1114, 1030, 927, 805 cm<sup>-1</sup>

**HRMS (ESI):** *m/z* calcd for C<sub>17</sub>H<sub>27</sub>O<sub>3</sub><sup>+</sup> [*M*+H]<sup>+</sup>: 279.1955, found 237.1886; C<sub>17</sub>H<sub>26</sub>NaO<sub>3</sub><sup>+</sup> [*M*+Na]<sup>+</sup>: 301.1774, found 301.1768.

**Melting point:** 122.8 – 123.5 °C

#### Synthesis of compound **S4**

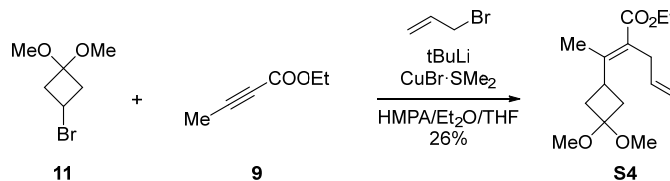

To a solution of compound **11** (195 mg, 1 mmol) in Et<sub>2</sub>O (1 mL), <sup>t</sup>BuLi (1.6 M in pentane, 1.3 mL, 2.05 mmol) was added at –78 °C and stirred for 1 h. The previously prepared alkyl lithium solution was then added to another flask containing CuBr·SMe<sub>2</sub> (205 mg, 1 mmol) suspended in tetrahydrofuran (THF, 5 mL) at –78 °C. After stirring at –78 °C for 10 min, compound **9** (112 mg, 1 mmol) was added, and the reaction mixture was stirred at –78 °C for 30 min. Hexamethylphosphoramide (HMPA, 1 mL) and allyl bromide (133 mg, 1.1 mmol) were then added to the reaction mixture at –78 °C. After stirring at 0 °C for 2 h, the reaction mixture was quenched with NH<sub>4</sub>Cl (sat. in H<sub>2</sub>O, 10 mL) and extracted with ethyl acetate (3 × 5 mL). The organic phase was washed with brine (sat. in H<sub>2</sub>O, 10 mL), dried with Na<sub>2</sub>SO<sub>4</sub> and concentrated under reduced pressure. The residue was purified by column

chromatography (silica gel, hexane:ethyl acetate = 20:1) to give compound **S4** (70.1 mg, 26% yield) as a colorless oil.

$R_f$  = 0.50 (hexane:ethyl acetate = 4:1)

$^1\text{H NMR}$  (500 MHz,  $\text{CDCl}_3$ )  $\delta$  5.76 (ddt,  $J$  = 17.2, 10.1, 6.0 Hz, 1H), 5.04 – 4.94 (m, 2H), 4.18 (q,  $J$  = 7.1 Hz, 2H), 3.23 – 3.18 (m, 1H), 3.18 (s, 3H), 3.14 (s, 3H), 3.08 – 3.04 (m, 2H), 2.36 – 2.29 (m, 2H), 2.14 – 2.07 (m, 2H), 1.97 (s, 3H), 1.28 (t,  $J$  = 7.1 Hz, 3H).

$^{13}\text{C NMR}$  (101 MHz,  $\text{CDCl}_3$ )  $\delta$  169.6, 145.9, 135.7, 126.7, 115.3, 99.9, 60.2, 48.7, 48.4, 36.1, 33.6, 28.4, 16.5, 14.3.

**IR (KBr)**  $\nu_{\text{max}}$  = 2982, 2949, 1712, 1445, 1274, 1202, 1152, 1043  $\text{cm}^{-1}$

**HRMS (ESI)**:  $m/z$  calcd for  $\text{C}_{15}\text{H}_{25}\text{O}_4^+$   $[\text{M}+\text{H}]^+$ : 269.1747, found 269.1745.

#### Synthesis of compound **S5**

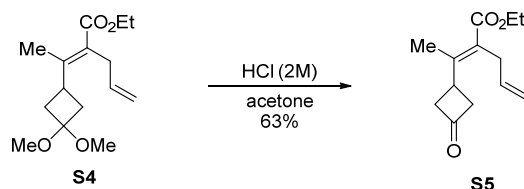

To a solution of compound **S4** (70.1 mg, 0.26 mmol) in acetone (5 mL), HCl (2 M in  $\text{H}_2\text{O}$ , 0.25 mL, 0.5 mmol) was added at room temperature. After stirring at room temperature for 12 h, the reaction mixture was quenched with  $\text{NaHCO}_3$  (sat. in  $\text{H}_2\text{O}$ , 10 mL) and extracted with ethyl acetate ( $3 \times 10$  mL). The organic phase was then washed with brine (sat. in  $\text{H}_2\text{O}$ , 20 mL), dried with  $\text{Na}_2\text{SO}_4$ , and concentrated under reduced pressure. The residue was then purified by column chromatography (silica gel, hexane:ethyl acetate = 20:1) to give compound **S5** (36.4 mg, 63% yield) as a colorless oil.

$R_f$  = 0.35 (hexane:ethyl acetate = 4:1)

$^1\text{H NMR}$  (500 MHz,  $\text{CDCl}_3$ )  $\delta$  5.80 (ddd,  $J$  = 17.3, 10.8, 6.0 Hz, 1H), 5.07 – 4.98 (m, 2H), 4.21 (qd,  $J$  = 7.1, 2.0 Hz, 2H), 3.57 (dd,  $J$  = 9.3, 7.2 Hz, 1H), 3.23 – 3.08 (m, 6H), 2.02 (s, 3H), 1.30 (t,  $J$  = 7.2 Hz, 3H).

$^{13}\text{C NMR}$  (101 MHz,  $\text{CDCl}_3$ )  $\delta$  205.8, 169.2, 144.1, 135.3, 127.9, 115.6, 60.5, 51.5, 33.7, 26.5, 15.6, 14.2.

**IR (KBr)**  $\nu_{\text{max}}$  = 2980, 2932, 1789, 1710, 1446, 1381, 1286, 1207, 1106, 1053  $\text{cm}^{-1}$

**HRMS (ESI)**:  $m/z$  calcd for  $\text{C}_{13}\text{H}_{19}\text{O}_3^+$   $[\text{M}+\text{H}]^+$ : 223.1329, found 223.1327.

#### Synthesis of compound **S6**

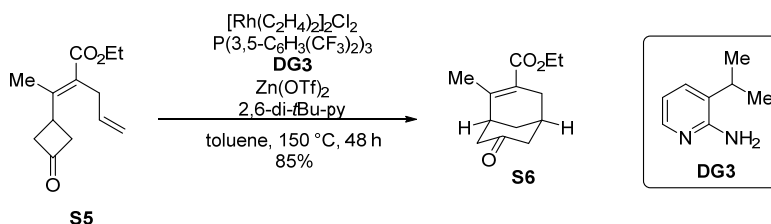

A flame dried 4 mL vial was charged with  $\text{P}(3,5\text{-C}_6\text{H}_3(\text{CF}_3)_2)_3$  (13.4 mg, 0.02 mmol), **DG3** (1.4 mg, 0.01 mmol),  $\text{Zn}(\text{OTf})_2$  (3.6 mg, 0.01 mmol) and 2,6-di-*tert*-butylpyridine (5.6  $\mu\text{L}$ , 0.025 mmol) in glove box. After adding a solution of compound **S5** (11 mg, 0.05 mmol) and  $[\text{Rh}(\text{C}_2\text{H}_4)_2\text{Cl}]_2$  (1.9 mg, 0.005 mmol) dissolved in toluene (0.5 mL), the vial was sealed and removed from the glove box. The reaction was stirred at 150  $^\circ\text{C}$  in a pi-block for 48 h, before it was cooled to room temperature. The reaction mixture was then concentrated under reduced pressure and the residue purified by column chromatography (silica gel, hexane:ethyl acetate = 10:1) to give compound **S6** (9.4 mg, 85% yield) as a colorless oil.

$R_f$  = 0.31 (hexane:ethyl acetate = 2:1)

$^1\text{H NMR}$  (500 MHz,  $\text{CDCl}_3$ )  $\delta$  4.14 (q,  $J$  = 7.2 Hz, 2H), 2.65 – 2.49 (m, 4H), 2.47 (d,  $J$  = 3.8 Hz, 2H), 2.30 (dd,  $J$  = 16.9, 4.4 Hz, 2H), 2.06 – 2.02 (m, 1H), 2.01 (s, 3H), 1.98 – 1.91 (m, 1H), 1.26 (t,  $J$  = 7.2 Hz, 3H).

**<sup>13</sup>C NMR** (101 MHz, CDCl<sub>3</sub>) δ 210.1, 168.0, 147.5, 122.9, 60.1, 48.7, 44.6, 38.9, 33.6, 29.7, 29.3, 20.8, 14.2.  
**IR (KBr)** ν<sub>max</sub> = 2927, 1712, 1639, 1437, 1372, 1238, 1196, 1063 cm<sup>-1</sup>  
**HRMS (ESI)**: m/z calcd for C<sub>13</sub>H<sub>19</sub>O<sub>3</sub><sup>+</sup> [M+H]<sup>+</sup>: 223.1329, found 223.1327; C<sub>13</sub>H<sub>18</sub>NaO<sub>3</sub><sup>+</sup> [M+Na]<sup>+</sup>: 245.1148, found 245.1144.

#### Synthesis of compound **S7**

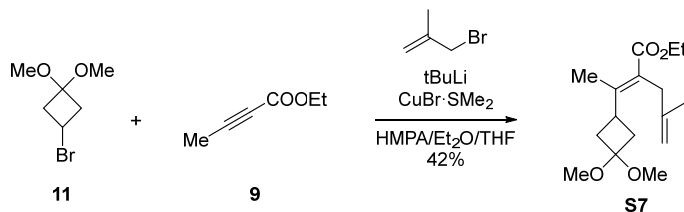

To a solution of compound **11** (195 mg, 1 mmol) in Et<sub>2</sub>O (1 mL), <sup>t</sup>BuLi (1.6 M in pentane, 1.3 mL, 2.05 mmol) was added at -78 °C and stirred at -78 °C for 1 h. To another flask with CuBr·SMe<sub>2</sub> (205 mg, 1 mmol) suspended in tetrahydrofuran (THF, 5 mL), the previously prepared alkyl lithium solution was then added at -78 °C. After stirring at -78 °C for 10 min, compound **9** (112 mg, 1 mmol) was added to the reaction mixture, which was then stirred at -78 °C for 30 min. Hexamethylphosphoramide (HMPA, 1 mL) and 3-bromo-2-methylpropene (162 mg, 1.2 mmol) were then added to the reaction mixture at -78 °C. After stirring at 0 °C for 2 h, the reaction mixture was quenched with NH<sub>4</sub>Cl (sat. in H<sub>2</sub>O, 10 mL) and extracted with ethyl acetate (3 × 5 mL). The organic phase was washed with brine (sat. in H<sub>2</sub>O, 10 mL), dried with Na<sub>2</sub>SO<sub>4</sub>, and concentrated under reduced pressure. The residue was then purified by column chromatography (silica gel, hexane:ethyl acetate = 20:1) to give compound **S7** (118.6 mg, 42% yield) as a colorless oil.

R<sub>f</sub> = 0.47 (hexane:ethyl acetate = 4:1)

**<sup>1</sup>H NMR** (500 MHz, CDCl<sub>3</sub>) δ 4.71 (s, 1H), 4.60 (s, 1H), 4.16 (q, *J* = 7.2 Hz, 2H), 3.20 – 3.11 (m, 7H), 3.00 (s, 2H), 2.33 – 2.26 (m, 2H), 2.14 – 2.07 (m, 2H), 1.97 (s, 3H), 1.70 (s, 3H), 1.26 (t, *J* = 7.1 Hz, 3H).

**<sup>13</sup>C NMR** (101 MHz, CDCl<sub>3</sub>) δ 169.8, 145.7, 143.3, 127.1, 110.7, 99.9, 60.1, 48.7, 48.3, 37.3, 36.0, 28.4, 22.7, 16.4, 14.2.

**IR (KBr)** ν<sub>max</sub> = 2984, 2948, 1712, 1446, 1274, 1227, 1197, 1151, 1044 cm<sup>-1</sup>

**HRMS (ESI)**: m/z calcd for C<sub>16</sub>H<sub>27</sub>O<sub>4</sub><sup>+</sup> [M+H]<sup>+</sup>: 283.1904, found 283.1902.

#### Synthesis of compound **S8**

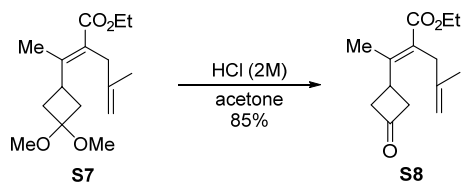

To a solution of compound **S7** (118.6 mg, 0.42 mmol) in acetone (8.5 mL), HCl (2 M in H<sub>2</sub>O, 0.4 mL, 0.8 mmol) was added at room temperature. After stirring at room temperature for 12 h, the reaction mixture was quenched with NaHCO<sub>3</sub> (sat. in H<sub>2</sub>O, 10 mL) and extracted with ethyl acetate (3 × 10 mL). The organic phase was washed with brine (sat. in H<sub>2</sub>O, 20 mL) and dried with Na<sub>2</sub>SO<sub>4</sub> and concentrated under reduced pressure. The residue was then purified by column chromatography (silica gel, hexane:ethyl acetate = 20:1) to give compound **S8** (84.2 mg, 85% yield) as a colorless oil.

R<sub>f</sub> = 0.50 (hexane:ethyl acetate = 4:1)

**<sup>1</sup>H NMR** (500 MHz, CDCl<sub>3</sub>) δ 4.76 (s, 1H), 4.63 (s, 1H), 4.19 (q, *J* = 7.2 Hz, 2H), 3.53 (p, *J* = 8.2 Hz, 1H), 3.21 – 3.10 (m, 4H), 3.09 (s, 2H), 2.02 (s, 3H), 1.73 (s, 3H), 1.28 (t, *J* = 7.1 Hz, 3H).

**<sup>13</sup>C NMR** (101 MHz, CDCl<sub>3</sub>) δ 205.9, 169.4, 144.1, 143.0, 128.3, 111.0, 60.4, 51.4, 37.5, 26.6, 22.7, 15.5, 14.2.

**IR (KBr)** ν<sub>max</sub> = 2980, 2934, 1789, 1710, 1447, 1380, 1292, 1198, 1105, 1069 cm<sup>-1</sup>

**HRMS (ESI):**  $m/z$  calcd for  $C_{14}H_{21}O_3^+$   $[M+H]^+$ : 237.1485, found 237.1485.

*Synthesis of compound S9*

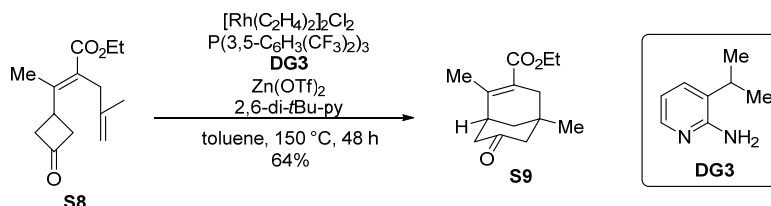

A flame dried 4 mL vial was charged with  $P(3,5-C_6H_3(CF_3)_2)_3$  (13.4 mg, 0.02 mmol), **DG3** (1.4 mg, 0.01 mmol),  $Zn(OTf)_2$  (3.6 mg, 0.01 mmol) and 2,6-di-*tert*-butylpyridine (5.6  $\mu$ L, 0.025 mmol) in glove box. After adding a solution of compound **S8** (11.8 mg, 0.05 mmol) and  $[Rh(C_2H_4)_2Cl]_2$  (1.9 mg, 0.005 mmol) dissolved in toluene (0.5 mL), the vial was sealed and removed from the glove box. The reaction was stirred at 150 °C in a pi-block for 48 h, before being cooled to room temperature. The reaction mixture was then concentrated under reduced pressure and purified by column chromatography (silica gel, hexane:ethyl acetate = 10:1) to give compound **S9** (7.6 mg, 64% yield) as a colorless oil.

$R_f$  = 0.35 (hexane:ethyl acetate = 2:1)

**$^1H$  NMR** (500 MHz,  $CDCl_3$ )  $\delta$  4.14 (q,  $J$  = 7.1 Hz, 2H), 2.65 (t,  $J$  = 3.5 Hz, 1H), 2.46 – 2.42 (m, 2H), 2.31 – 2.21 (m, 2H), 2.20 (s, 2H), 2.01 (t,  $J$  = 2.0 Hz, 3H), 1.88 – 1.77 (m, 2H), 1.27 (t,  $J$  = 7.1 Hz, 3H), 1.13 (s, 3H).

**$^{13}C$  NMR** (101 MHz,  $CDCl_3$ )  $\delta$  209.7, 167.8, 147.1, 123.4, 60.1, 55.4, 43.9, 40.7, 40.2, 37.5, 33.9, 31.3, 20.6, 14.2.

**IR (KBr)**  $\nu_{max}$  = 2923, 1712, 1638, 1456, 1371, 1241, 1139, 1060  $cm^{-1}$

**HRMS (ESI):**  $m/z$  calcd for  $C_{14}H_{21}O_3^+$   $[M+H]^+$ : 237.1485, found 237.1481;  $C_{14}H_{20}NaO_3^+$   $[M+Na]^+$ : 259.1305, found 259.1301.

*Synthesis of compound DG4*

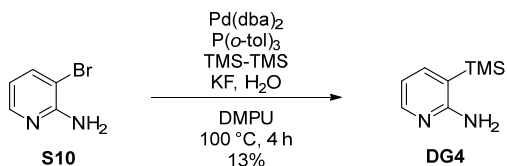

To a solution of compound **S10** (173 mg, 1 mmol) in *N,N'*-dimethylpropyleneurea (DMPU, 3.3 mL), bis(dibenzylideneacetone)palladium(0) ( $Pd(dba)_2$ , 17 mg, 0.03 mmol), tri(*o*-tolyl)phosphine ( $P(o-tol)_3$ , 27 mg, 0.09 mmol), KF (290 mg, 5 mmol), hexamethyldisilane (244  $\mu$ L, 1.2 mmol) and  $H_2O$  (36  $\mu$ L, 2 mmol) were added at room temperature. After stirring at 100 °C for 4 h, the reaction mixture was quenched with  $H_2O$  (10 mL) and extracted with ethyl acetate ( $3 \times 10$  mL). The organic phase was washed with brine (sat. in  $H_2O$ , 20 mL), dried with  $Na_2SO_4$ , and concentrated under reduced pressure. The residue was then purified by column chromatography (silica gel, hexane:ethyl acetate = 4:1) to give compound **DG4** (20.9 mg, 13% yield) as a white solid.

$R_f$  = 0.52 (pure ethyl acetate)

**$^1H$  NMR** (500 MHz,  $CDCl_3$ )  $\delta$  8.05 (dd,  $J$  = 5.0, 2.0 Hz, 1H), 7.53 (dd,  $J$  = 7.1, 2.0 Hz, 1H), 6.64 (dd,  $J$  = 7.1, 5.0 Hz, 1H), 4.55 (s, 2H), 0.32 (s, 9H).

**$^{13}C$  NMR** (126 MHz,  $CDCl_3$ )  $\delta$  161.7, 149.0, 143.9, 116.5, 114.2, -1.4.

**IR (KBr)**  $\nu_{max}$  = 3495, 3395, 3308, 3175, 2955, 1607, 1566, 1427, 1252, 873, 839  $cm^{-1}$

**HRMS (ESI):**  $m/z$  calcd for  $C_8H_{15}N_2Si^+$   $[M+H]^+$ : 167.0999, found 167.1001.

**Melting point:** 48.0 – 48.8 °C

### 3. Comparison of the Spectroscopic Data of the Natural and Synthetic Products

Table S1. Comparison of the  $^1\text{H}$ -NMR (Acetone- $\text{D}_6$ ) Data of the Synthetic Penicibilaene A (**1**)

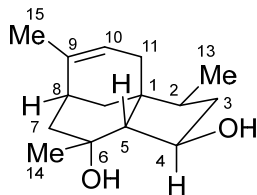

Penicibilaene A (**1**)

| No.         | Wang's isolated natural penicibilaene ( <b>1</b> ) <sup>5</sup><br>$\delta$ $^1\text{H}$ [ppm, mult, J (Hz)] 500 MHz | Our synthetic penicibilaene ( <b>1</b> )<br>$\delta$ $^1\text{H}$ [ppm, mult, J (Hz)] 500 MHz |
|-------------|----------------------------------------------------------------------------------------------------------------------|-----------------------------------------------------------------------------------------------|
| 2           | 1.69 (m, 1H)                                                                                                         | 1.69 (m, 1H)                                                                                  |
| 3 $\alpha$  | 2.07 (m, 1H)                                                                                                         | 2.07 (m, 1H)                                                                                  |
| 3 $\beta$   | 1.38 (dt, 11.7, 8.6, 1H)                                                                                             | 1.38 (dt, 11.8, 8.6, 1H)                                                                      |
| 4           | 4.45 (m, 1H)                                                                                                         | 4.45 (p, 6.9, 1H)                                                                             |
| 5           | 1.46 (d, 6.2, 1H)                                                                                                    | 1.46 (d, 6.2, 1H)                                                                             |
| 7 $\alpha$  | 1.86 (dd, 12.0, 4.8, 1H)                                                                                             | 1.86 (m, 1H)                                                                                  |
| 7 $\beta$   | 1.30 (dd, 12.0, 3.9, 1H)                                                                                             | 1.30 (ddd, J = 11.6, 4.0, 1.4 Hz, 1H)                                                         |
| 8           | 2.15 (dd, 4.8, 3.9, 1H)                                                                                              | 2.15 (d, 8.5, 1H)                                                                             |
| 10          | 5.23 (dd, 3.1, 1.5, 1H)                                                                                              | 5.23 (d, 4.9 Hz, 1H)                                                                          |
| 11 $\alpha$ | 2.01 (d, 16.3, 1H)                                                                                                   | 2.00 (m, 1H)                                                                                  |
| 11 $\beta$  | 1.74 (m, 1H)                                                                                                         | 1.74 (m, 1H)                                                                                  |
| 12 $\alpha$ | 1.90 (dd, 14.2, 5.6, 1H)                                                                                             | 1.89 (m, 1H)                                                                                  |
| 12 $\beta$  | 1.50 (d, 14.2, 1H)                                                                                                   | 1.50 (d, 14.2, 1H)                                                                            |
| 13          | 0.89 (d, 7.1, 3H)                                                                                                    | 0.88 (d, 7.0, 3H)                                                                             |
| 14          | 1.26 (s, 3H)                                                                                                         | 1.26 (s, 3H)                                                                                  |
| 15          | 1.63 (br s, 3H)                                                                                                      | 1.63 (d, 2.0, 3H)                                                                             |
| 4-OH        | 3.40 (d, 5.2, 1H)                                                                                                    | 3.41 (d, 5.3, 1H)                                                                             |
| 6-OH        | 3.20 (s, 1H)                                                                                                         | 3.21 (s, 1H)                                                                                  |



Table S2. Comparison of the  $^{13}\text{C}$ -NMR (Acetone- $\text{D}_6$ ) Data of the Synthetic Penicibilaene A (**1**)

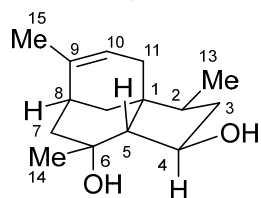

Penicibilaene A (**1**)

| No. | Wang's isolated natural penicibilaene ( <b>1</b> ) <sup>5</sup><br>$\delta^{13}\text{C}$ [ppm, mult, J (Hz)] 125 MHz | Our synthetic penicibilaene ( <b>1</b> )<br>$\delta^{13}\text{C}$ [ppm, mult, J (Hz)] 101 MHz |
|-----|----------------------------------------------------------------------------------------------------------------------|-----------------------------------------------------------------------------------------------|
| 1   | 42.58                                                                                                                | 42.54                                                                                         |
| 2   | 42.62                                                                                                                | 42.60                                                                                         |
| 3   | 42.5                                                                                                                 | 42.5                                                                                          |
| 4   | 73.4                                                                                                                 | 73.4                                                                                          |
| 5   | 61.5                                                                                                                 | 61.5                                                                                          |
| 6   | 71.3                                                                                                                 | 71.3                                                                                          |
| 7   | 33.3                                                                                                                 | 33.3                                                                                          |
| 8   | 36.1                                                                                                                 | 36.0                                                                                          |
| 9   | 140.9                                                                                                                | 140.9                                                                                         |
| 10  | 120.7                                                                                                                | 120.7                                                                                         |
| 11  | 35.4                                                                                                                 | 35.4                                                                                          |
| 12  | 42.4                                                                                                                 | 42.4                                                                                          |
| 13  | 15.0                                                                                                                 | 15.0                                                                                          |
| 14  | 31.4                                                                                                                 | 31.4                                                                                          |
| 15  | 22.2                                                                                                                 | 22.2                                                                                          |

Table S3. Comparison of the  $^1\text{H}$ -NMR ( $\text{CDCl}_3$ ) Data of the Synthetic Penicibilaene B (**2**)

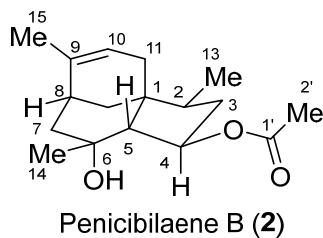

| No.         | Wang's isolated natural penicibilaene ( <b>2</b> ) <sup>5</sup><br>$\delta$ $^1\text{H}$ [ppm, mult, J (Hz)] 500 MHz | Our synthetic penicibilaene ( <b>2</b> )<br>$\delta$ $^1\text{H}$ [ppm, mult, J (Hz)] 500 MHz |
|-------------|----------------------------------------------------------------------------------------------------------------------|-----------------------------------------------------------------------------------------------|
| 2           | 1.80 (m, 1H)                                                                                                         | 1.83 (dd, 14.7, 9.1, 1H)                                                                      |
| 3 $\alpha$  | 2.28 (ddd, 12.5, 7.1, 6.6, 1H)                                                                                       | 2.31 (ddd, 12.8, 7.5, 5.8, 1H)                                                                |
| 3 $\beta$   | 1.34 (dt, 12.5, 8.7, 1H)                                                                                             | 1.37 (dt, 12.4, 8.7, 1H)                                                                      |
| 4           | 5.33 (ddd, 8.7, 6.6, 6.0, 1H)                                                                                        | 5.36 (ddd, 8.7, 7.6, 6.0, 1H)                                                                 |
| 5           | 1.70 (d, 6.0, 1H)                                                                                                    | 1.72 (d, 6.1, 1H)                                                                             |
| 7 $\alpha$  | 1.78 (dd, 11.9, 6.2, 1H)                                                                                             | 1.77 (m, 1H)                                                                                  |
| 7 $\beta$   | 1.41 (dd, 11.9, 2.5, 1H)                                                                                             | 1.44 (ddd, 11.8, 3.9, 1.5, 1H)                                                                |
| 8           | 2.18 (dd, 6.2, 2.5, 1H)                                                                                              | 2.22 (d, 9.2, 1H)                                                                             |
| 10          | 5.24 (d, 4.2, 1H)                                                                                                    | 5.26 (d, 4.9, 1H)                                                                             |
| 11 $\alpha$ | 2.02 (d, 16.0, 1H)                                                                                                   | 2.05 (d, 17.0, 1H)                                                                            |
| 11 $\beta$  | 1.70 (m, 1H)                                                                                                         | 1.70 (m, 1H)                                                                                  |
| 12 $\alpha$ | 1.75 (dd, 14.5, 6.3, 1H)                                                                                             | 1.75 (m, 1H)                                                                                  |
| 12 $\beta$  | 1.50 (d, 14.5, 1H)                                                                                                   | 1.53 (dt, 14.6, 1.3, 1H)                                                                      |
| 13          | 0.88 (d, 6.9, 3H)                                                                                                    | 0.91 (d, 6.9, 3H)                                                                             |
| 14          | 1.13 (s, 3H)                                                                                                         | 1.15 (s, 3H)                                                                                  |
| 15          | 1.63 (m, 3H)                                                                                                         | 1.65 (dt, 2.7, 1.5, 3H)                                                                       |
| 2'          | 1.97 (s, 3H)                                                                                                         | 2.00 (s, 3H)                                                                                  |
| 6-OH        |                                                                                                                      | 1.13 (s, 1H)                                                                                  |

Table S4. Comparison of the  $^1\text{H}$ -NMR ( $\text{CDCl}_3$ ) Data of the Synthetic Penicibilaene B (**2**)

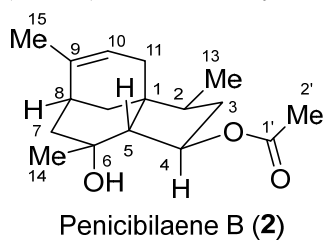

| No. | Wang's isolated natural penicibilaene ( <b>2</b> ) <sup>5</sup><br>$\delta^{13}\text{C}$ [ppm, mult, J (Hz)] 125 MHz | Our synthetic penicibilaene ( <b>2</b> )<br>$\delta^{13}\text{C}$ [ppm, mult, J (Hz)] 101 MHz |
|-----|----------------------------------------------------------------------------------------------------------------------|-----------------------------------------------------------------------------------------------|
| 1   | 41.5                                                                                                                 | 41.2                                                                                          |
| 2   | 42.1                                                                                                                 | 41.8                                                                                          |
| 3   | 38.6                                                                                                                 | 38.3                                                                                          |
| 4   | 75.8                                                                                                                 | 75.5                                                                                          |
| 5   | 57.1                                                                                                                 | 56.8                                                                                          |
| 6   | 71.3                                                                                                                 | 71.1                                                                                          |
| 7   | 32.2                                                                                                                 | 31.9                                                                                          |
| 8   | 34.7                                                                                                                 | 34.4                                                                                          |
| 9   | 140.5                                                                                                                | 140.3                                                                                         |
| 10  | 119.7                                                                                                                | 119.4                                                                                         |
| 11  | 34.4                                                                                                                 | 34.2                                                                                          |
| 12  | 41.9                                                                                                                 | 41.7                                                                                          |
| 13  | 14.1                                                                                                                 | 13.9                                                                                          |
| 14  | 30.5                                                                                                                 | 30.3                                                                                          |
| 15  | 22.1                                                                                                                 | 21.8                                                                                          |
| 1'  | 171.1                                                                                                                | 170.9                                                                                         |
| 2'  | 21.6                                                                                                                 | 21.4                                                                                          |

## 4. Optimization of Selected Reaction Conditions

**Table S5.** Optimization of Three-Component Coupling<sup>a</sup>

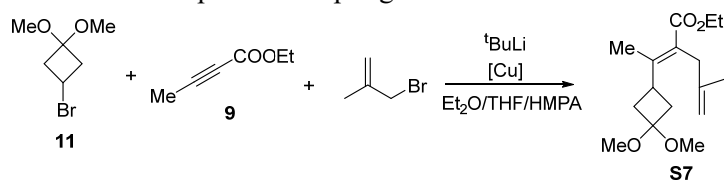

| Entry | [Cu]                  | Temperature <sup>b</sup> | Yield <sup>c</sup> |
|-------|-----------------------|--------------------------|--------------------|
| 1     | CuI                   | -78 °C/-78 °C            | trace              |
| 2     | CuCN                  | -78 °C/-78 °C            | 18% <sup>d</sup>   |
| 3     | CuBr•SMe <sub>2</sub> | -78 °C/-78 °C            | 48% <sup>e</sup>   |
| 4     | CuBr•SMe <sub>2</sub> | 0 °C/-78 °C              | 37%                |
| 5     | CuBr•SMe <sub>2</sub> | -78 °C/0 °C              | trace              |

<sup>a</sup>Unless otherwise mentioned, the reaction was run on a 0.26 mmol scale. <sup>b</sup>Temperature for the lithium-bromide exchange step/temperature for the alkyne insertion step. <sup>c</sup>Determined by <sup>1</sup>H-NMR using tetrachloroethane as the internal standard. <sup>d</sup>Isolated yield; the reaction was run on a 0.51 mmol scale. <sup>e</sup>Isolated yield.

## 5. Gas Chromatography Data

### GC calibration curve of ketone 5 with 1-methylnaphthalene as the internal standard

GC Method for ketone 5: Starting from 50 °C, followed by a temperature increase of 10 °C/min to 280 °C, hold 0 min (total run time: 23 min). Retention time: 5 17.921 min; 1-methylnaphthalene 9.652 min

### GC spectra of compound 5

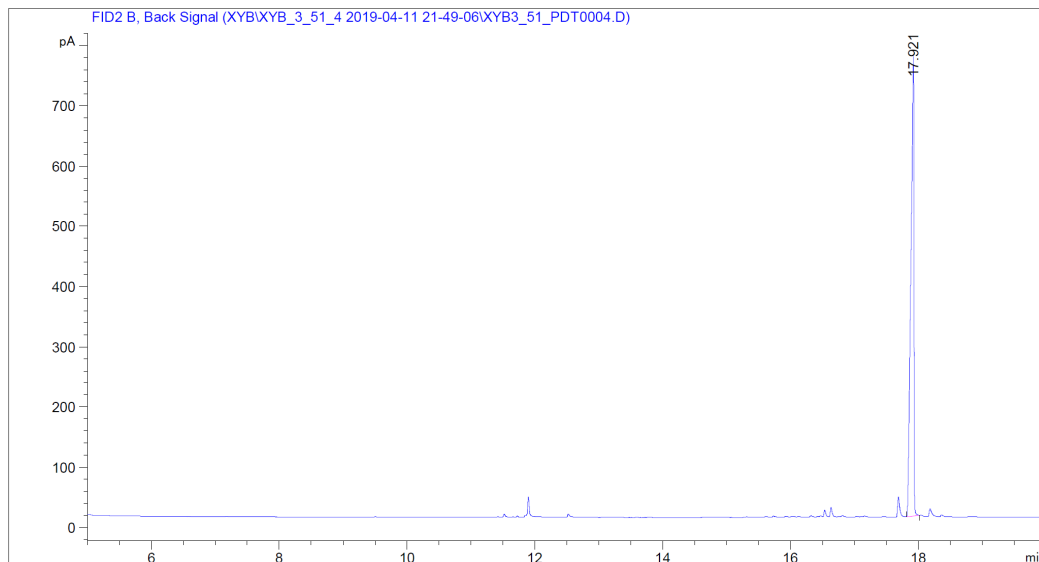

| Peak # | RetTime [min] | Type | Width [min] | Area [pA*s] | Height [pA] | Area %  |
|--------|---------------|------|-------------|-------------|-------------|---------|
| 1      | 17.921        | BB   | 0.0431      | 2508.40869  | 763.27112   | 1.000e2 |

### GC spectra of 1-methylnaphthalene

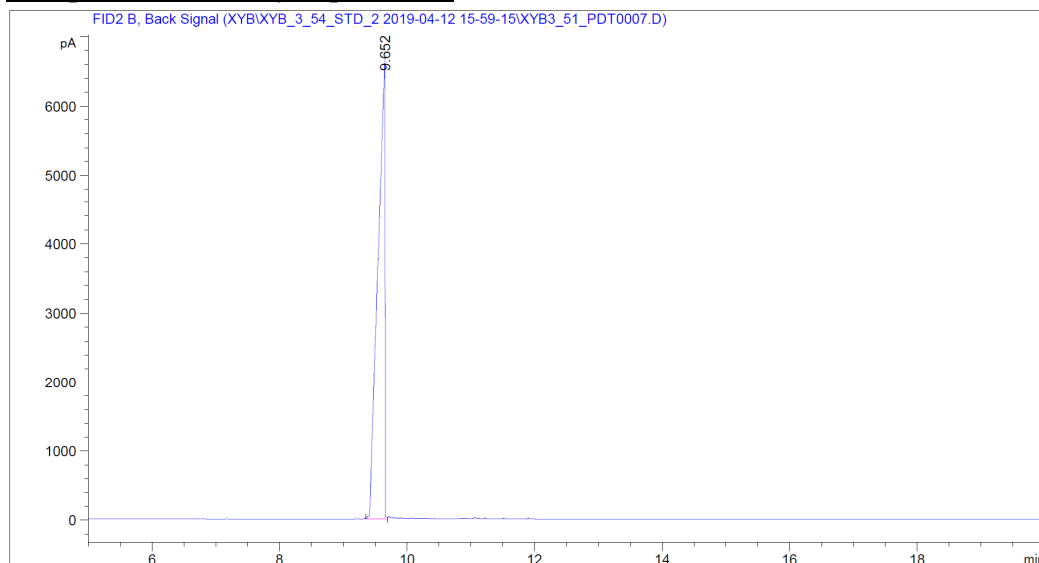

| Peak # | RetTime [min] | Type | Width [min] | Area [pA*s] | Height [pA] | Area %  |
|--------|---------------|------|-------------|-------------|-------------|---------|
| 1      | 9.652         | VV   | 0.0945      | 5.04438e4   | 6563.46289  | 1.000e2 |

### GC spectra of Table 1, Entry 8

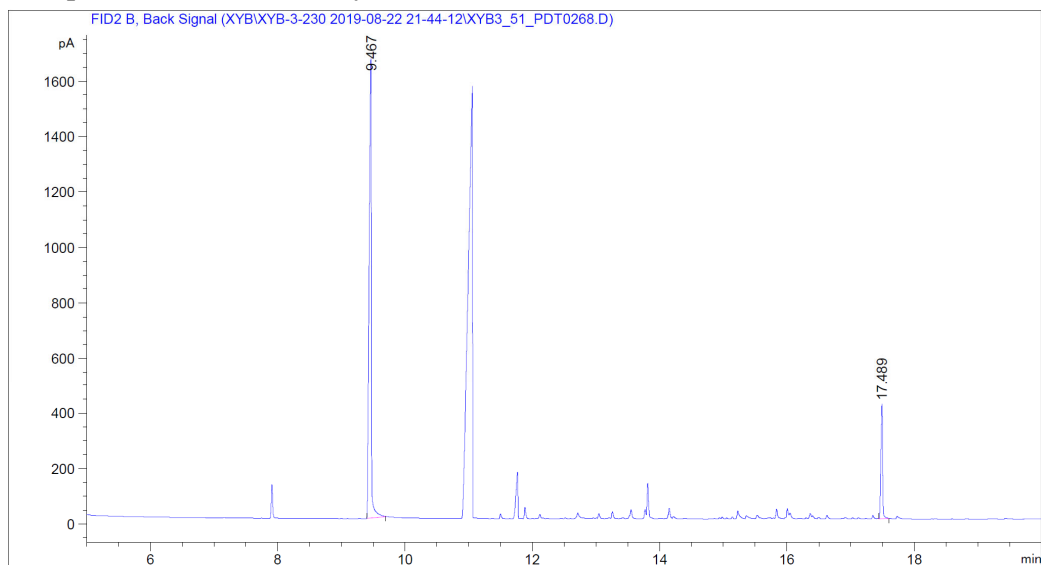

| Peak # | RetTime [min] | Type | Width [min] | Area [pA*s] | Height [pA] | Area %   |
|--------|---------------|------|-------------|-------------|-------------|----------|
| 1      | 9.467         | BB   | 0.0345      | 4105.78857  | 1657.66345  | 84.00989 |
| 2      | 17.489        | VB   | 0.0285      | 781.47980   | 413.07098   | 15.99011 |

**Table S6.** GC Data of Compound 5 with 1-Methylnaphthalene as Internal Standard

| entry | 1-methylnaphthalene |        | Compound 5 |       | x        | y       |
|-------|---------------------|--------|------------|-------|----------|---------|
|       | V (μL)              | area   | m (mg)     | area  | x = a/a  | y = m/V |
| 1     | 10                  | 6431   | 1.6 mg     | 97.4  | 0.015145 | 0.16    |
| 2     | 10                  | 8007.6 | 3.1 mg     | 308.1 | 0.038476 | 0.31    |
| 3     | 10                  | 6699.8 | 4.7 mg     | 406.2 | 0.060629 | 0.47    |
| 4     | 10                  | 8795.1 | 6.3 mg     | 768.9 | 0.087424 | 0.63    |
| 5     | 10                  | 6716.5 | 7.9 mg     | 778.2 | 0.115864 | 0.79    |

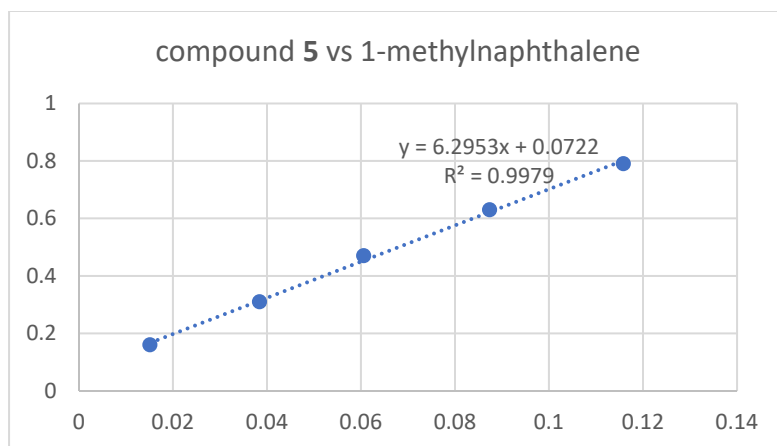

**Figure S1.** GC calibration Curve of Compound 5 with 1-Methylnaphthalene as Internal Standard.

**GC yield determination for compound 5:**

5  $\mu$ L 1-methylnaphthalene was added as internal standard.

$$x = (\text{GC area } \mathbf{5}) / (\text{GC area 1-methylnaphthalene}) = 781.5 / 4105.8 = 0.1903$$

$$\text{mass of } \mathbf{5} = \text{volume of 1-methylnaphthalene} \times (6.2953 \times 0.1903 + 0.0722) = 6.3 \text{ mg}$$

$$\text{yield of } \mathbf{5} = 6.3 / 13.1 \times 100\% = 48\%$$

## 6. Preliminary Result of Substrate Scope

**Table S7.** Preliminary Result of Substrate Scope of the “Cut-and-Sew” Reaction with  $\alpha,\beta$ -Unsaturated Ester Linker.<sup>a</sup>

$[\text{Rh}(\text{C}_2\text{H}_4)_2]_2\text{Cl}_2$  (10 mol%)  
 $\text{P}(3,5\text{-C}_6\text{H}_3(\text{CF}_3)_2)_3$  (40 mol%)  
**DG3** (20 mol%)  
 $\text{Zn}(\text{OTf})_2$  (20 mol%)  
 $2,6\text{-di-}t\text{-Bu-py}$  (50 mol%)  
 toluene (0.1 M), 150 °C, 48 h

| Entry | Substrate     | Product       | Yield <sup>b</sup> |
|-------|---------------|---------------|--------------------|
| 1     | <br><b>S5</b> | <br><b>S6</b> | 85%                |
| 2     | <br><b>S8</b> | <br><b>S9</b> | 64%                |

<sup>a</sup>Unless otherwise mentioned, the reaction was run on a 0.05 mmol scale. <sup>b</sup>Isolated yield.



## 7. Crystal Data and Structure Refinement

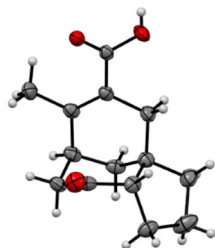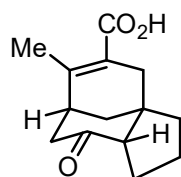

**12**

### CCDC #2078710

|                                             |                                                               |
|---------------------------------------------|---------------------------------------------------------------|
| Identification code                         | mo_1019_SHO_YX_0m                                             |
| Empirical formula                           | C <sub>14</sub> H <sub>18</sub> O <sub>3</sub>                |
| Formula weight                              | 234.28                                                        |
| Temperature/K                               | 100(2)                                                        |
| Crystal system                              | monoclinic                                                    |
| Space group                                 | P2 <sub>1</sub> /n                                            |
| a/Å                                         | 9.7164(6)                                                     |
| b/Å                                         | 13.8970(8)                                                    |
| c/Å                                         | 9.9583(6)                                                     |
| α/°                                         | 90                                                            |
| β/°                                         | 115.861(2)                                                    |
| γ/°                                         | 90                                                            |
| Volume/Å <sup>3</sup>                       | 1210.00(13)                                                   |
| Z                                           | 4                                                             |
| ρ <sub>calc</sub> /cm <sup>3</sup>          | 1.286                                                         |
| μ/mm <sup>-1</sup>                          | 0.089                                                         |
| F(000)                                      | 504.0                                                         |
| Crystal size/mm <sup>3</sup>                | 0.586 × 0.574 × 0.332                                         |
| Radiation                                   | MoKα (λ = 0.71073)                                            |
| 2θ range for data collection/°              | 4.888 to 48.904                                               |
| Index ranges                                | -11 ≤ h ≤ 11, -16 ≤ k ≤ 16, -11 ≤ l ≤ 11                      |
| Reflections collected                       | 19941                                                         |
| Independent reflections                     | 2006 [R <sub>int</sub> = 0.0243, R <sub>sigma</sub> = 0.0106] |
| Data/restraints/parameters                  | 2006/0/156                                                    |
| Goodness-of-fit on F <sup>2</sup>           | 1.045                                                         |
| Final R indexes [I ≥ 2σ (I)]                | R <sub>1</sub> = 0.0356, wR <sub>2</sub> = 0.0930             |
| Final R indexes [all data]                  | R <sub>1</sub> = 0.0376, wR <sub>2</sub> = 0.0948             |
| Largest diff. peak/hole / e Å <sup>-3</sup> | 0.22/-0.18                                                    |

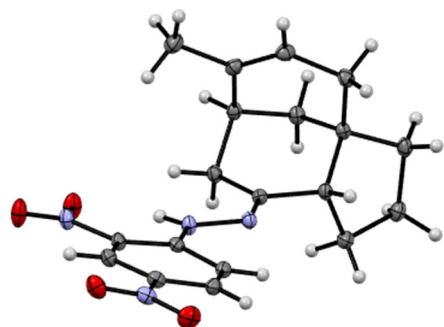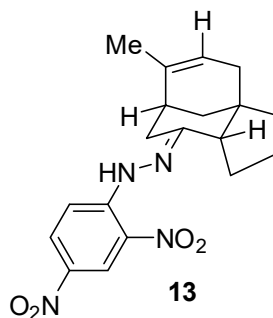

**CCDC #2078965**

|                                             |                                                               |
|---------------------------------------------|---------------------------------------------------------------|
| Identification code                         | xyb-3-286                                                     |
| Empirical formula                           | C <sub>19</sub> H <sub>22</sub> N <sub>4</sub> O <sub>4</sub> |
| Formula weight                              | 370.40                                                        |
| Temperature/K                               | 100(2)                                                        |
| Crystal system                              | monoclinic                                                    |
| Space group                                 | P2 <sub>1</sub> /c                                            |
| a/Å                                         | 13.5093(13)                                                   |
| b/Å                                         | 6.2144(6)                                                     |
| c/Å                                         | 20.982(2)                                                     |
| α/°                                         | 90                                                            |
| β/°                                         | 96.738(2)                                                     |
| γ/°                                         | 90                                                            |
| Volume/Å <sup>3</sup>                       | 1749.3(3)                                                     |
| Z                                           | 4                                                             |
| ρ <sub>calc</sub> /cm <sup>3</sup>          | 1.406                                                         |
| μ/mm <sup>-1</sup>                          | 0.101                                                         |
| F(000)                                      | 784.0                                                         |
| Crystal size/mm <sup>3</sup>                | 0.514 × 0.225 × 0.126                                         |
| Radiation                                   | MoKα (λ = 0.71073)                                            |
| 2θ range for data collection/°              | 4.66 to 61.44                                                 |
| Index ranges                                | -19 ≤ h ≤ 19, -8 ≤ k ≤ 8, -30 ≤ l ≤ 30                        |
| Reflections collected                       | 55097                                                         |
| Independent reflections                     | 5423 [R <sub>int</sub> = 0.0328, R <sub>sigma</sub> = 0.0173] |
| Data/restraints/parameters                  | 5423/0/249                                                    |
| Goodness-of-fit on F <sup>2</sup>           | 1.043                                                         |
| Final R indexes [I ≥ 2σ (I)]                | R <sub>1</sub> = 0.0401, wR <sub>2</sub> = 0.0995             |
| Final R indexes [all data]                  | R <sub>1</sub> = 0.0497, wR <sub>2</sub> = 0.1051             |
| Largest diff. peak/hole / e Å <sup>-3</sup> | 0.46/-0.17                                                    |

## 8. NMR Spectra

$^1\text{H}$ -NMR spectrum of **11** in  $\text{CDCl}_3$ , 500 MHz

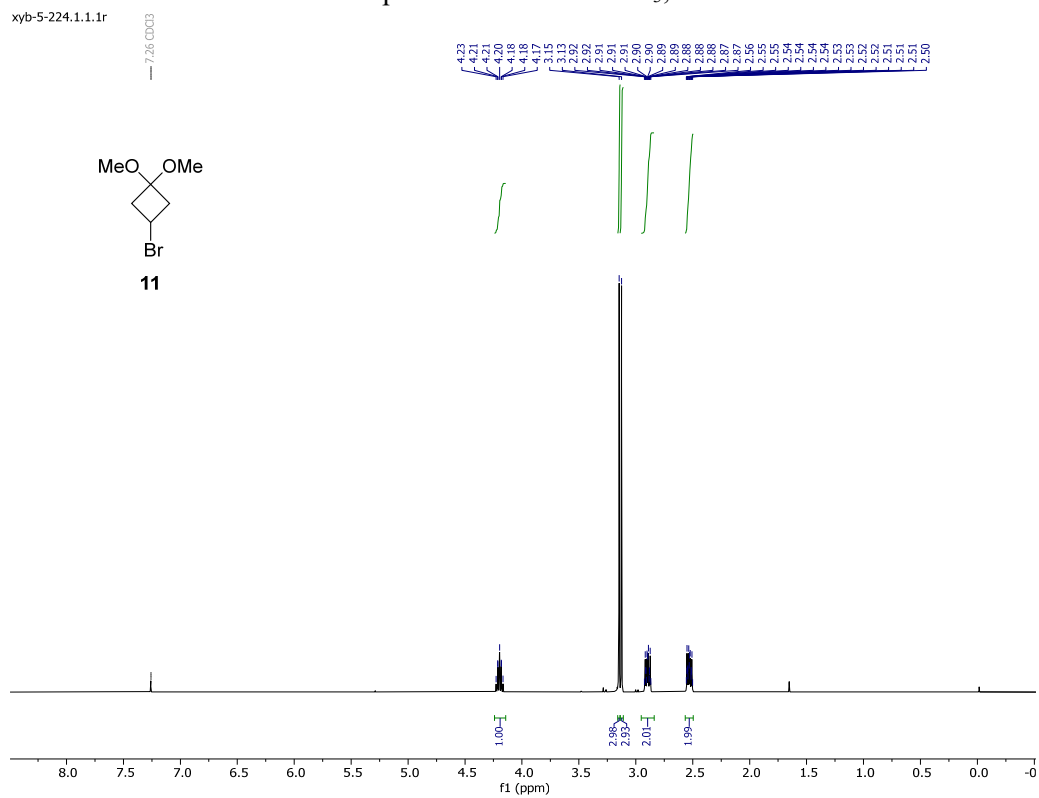

$^{13}\text{C}$ -NMR spectrum of **11** in  $\text{CDCl}_3$ , 126 MHz

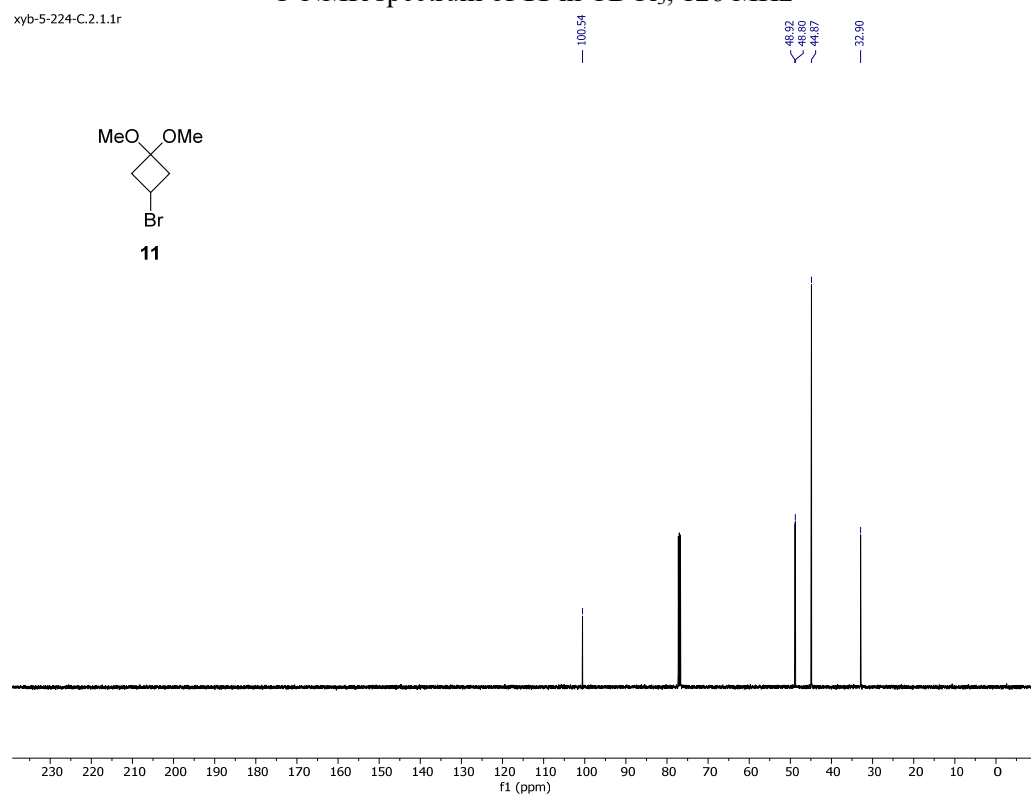

<sup>1</sup>H-NMR spectrum of **6** in CDCl<sub>3</sub>, 500 MHz

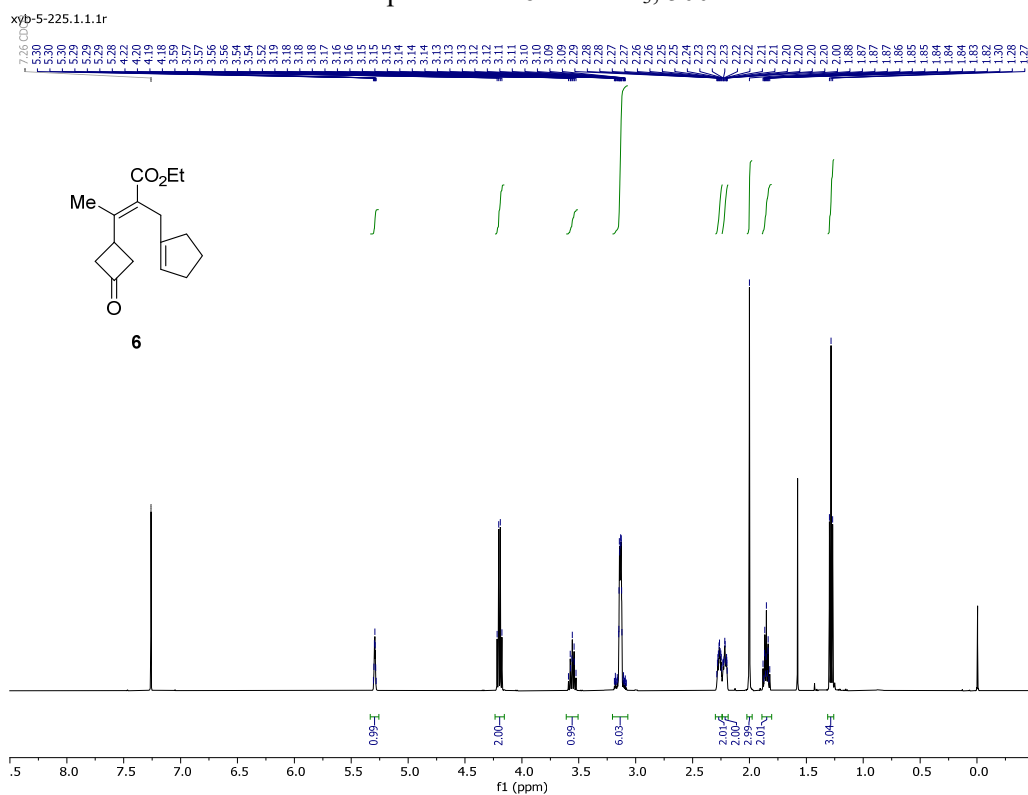

<sup>13</sup>C-NMR spectrum of **6** in CDCl<sub>3</sub>, 101 MHz

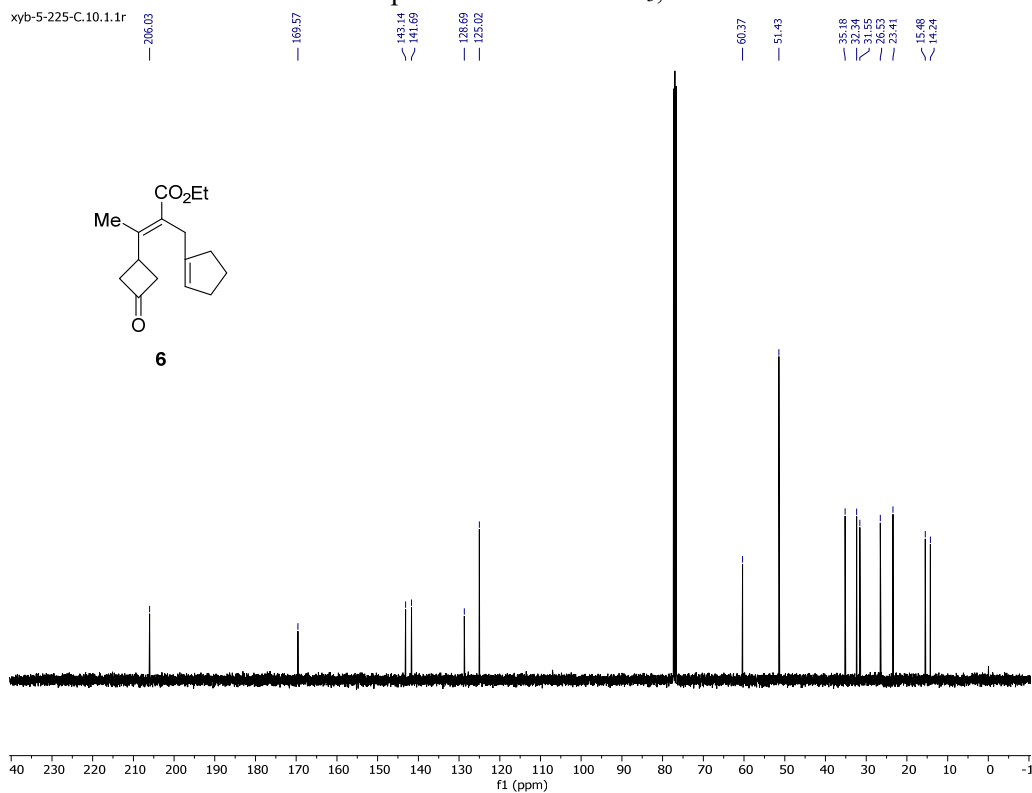

<sup>1</sup>H-NMR spectrum of **5** in CDCl<sub>3</sub>, 500 MHz

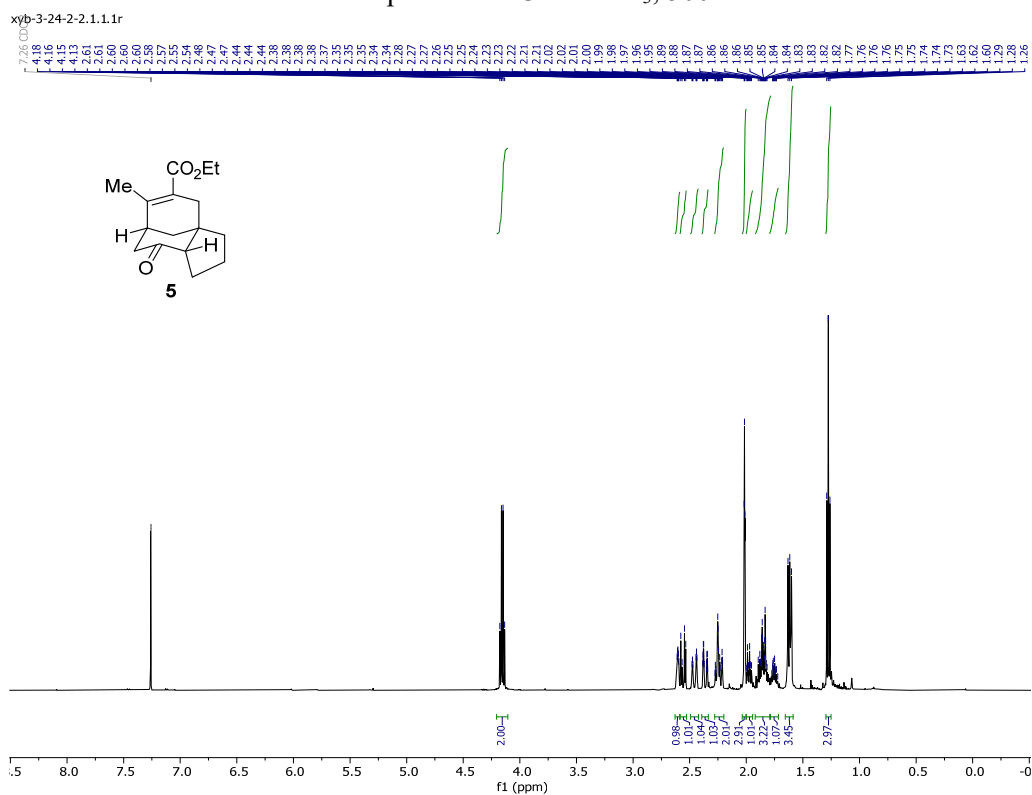

<sup>13</sup>C-NMR spectrum of **5** in CDCl<sub>3</sub>, 101 MHz

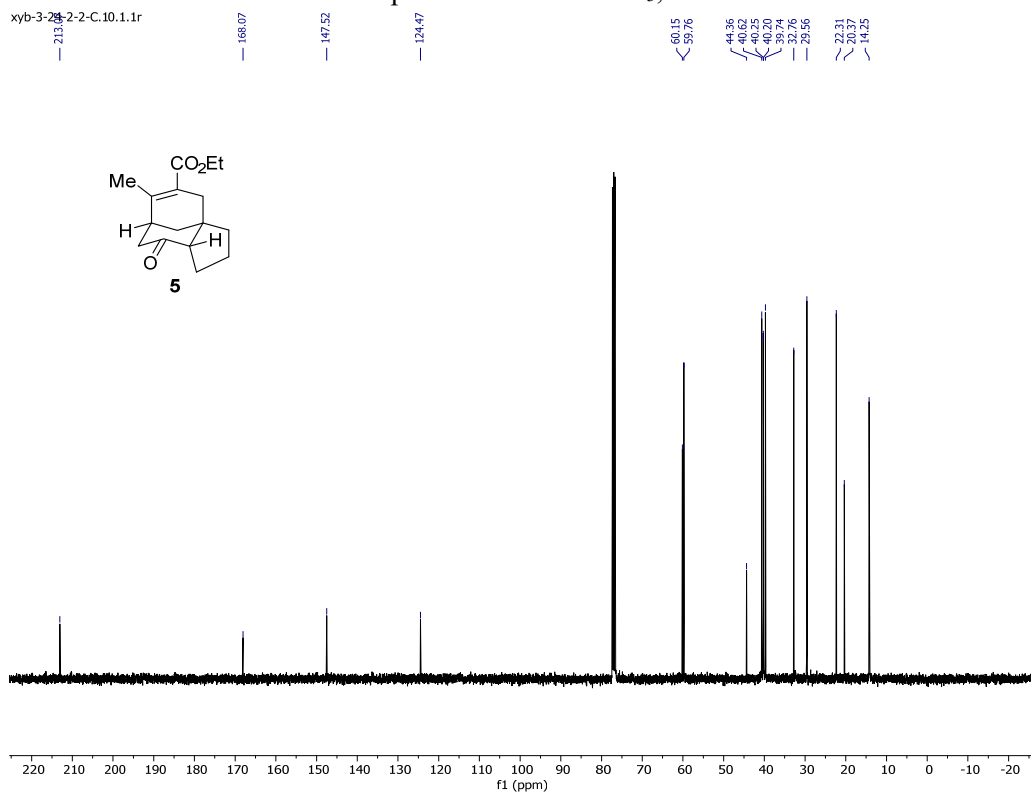

<sup>1</sup>H-NMR spectrum of **12** in CDCl<sub>3</sub>, 500 MHz

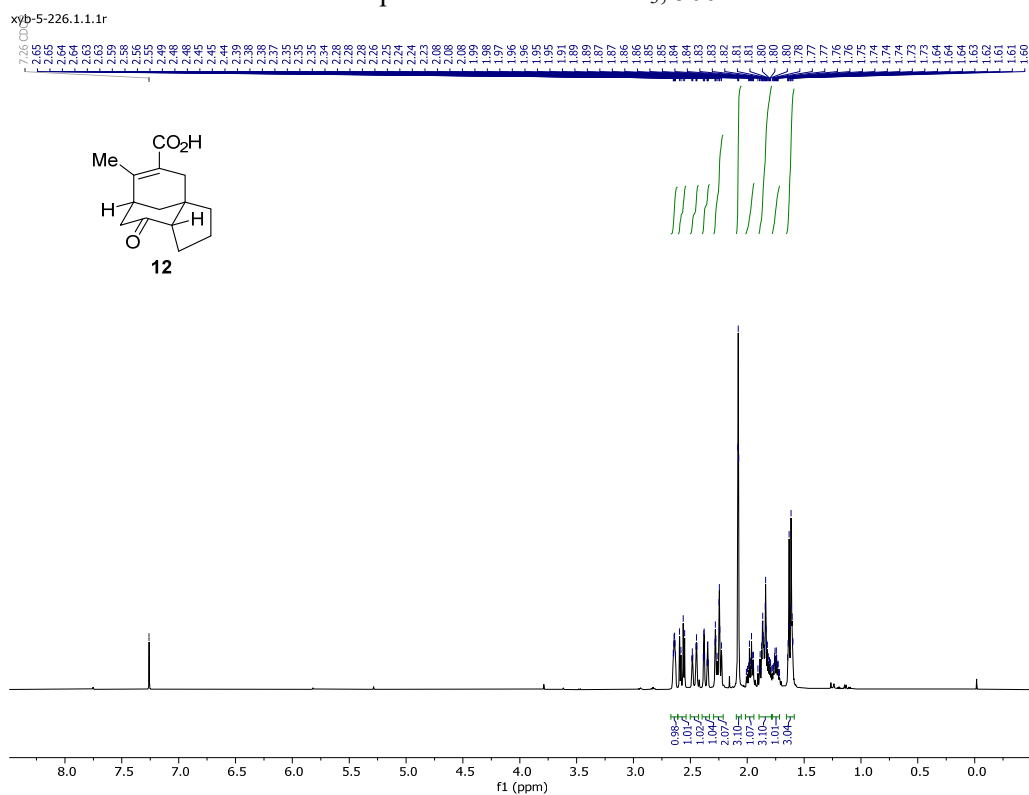

<sup>13</sup>C-NMR spectrum of **12** in CDCl<sub>3</sub>, 101 MHz

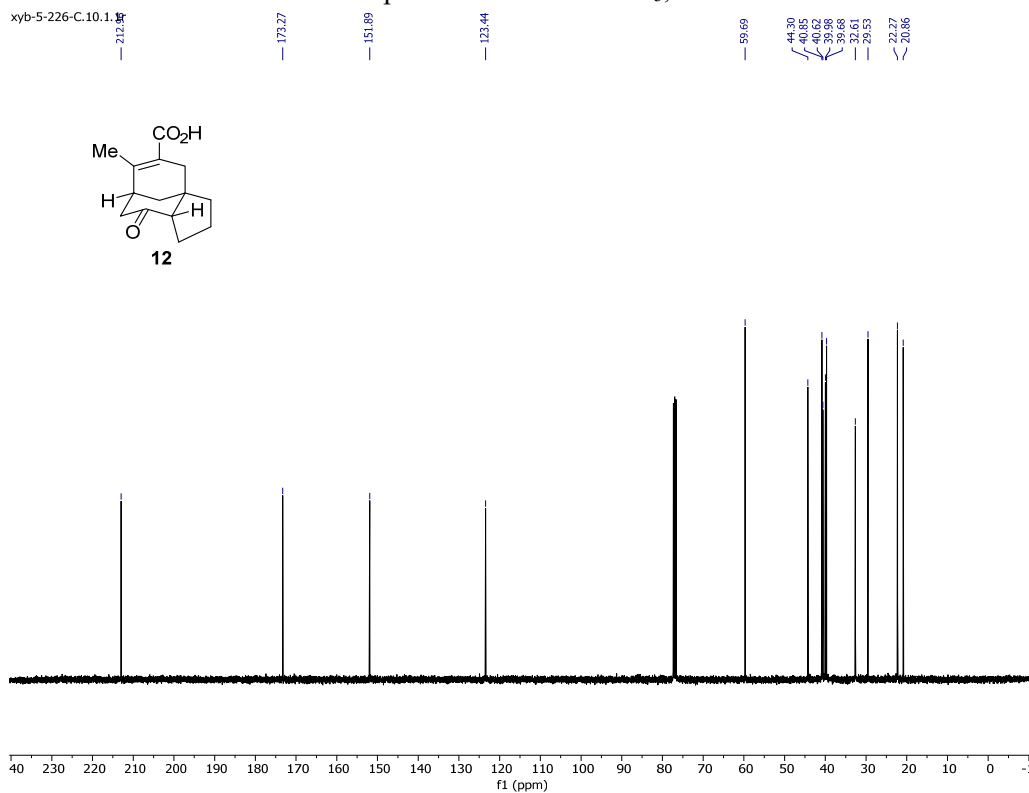

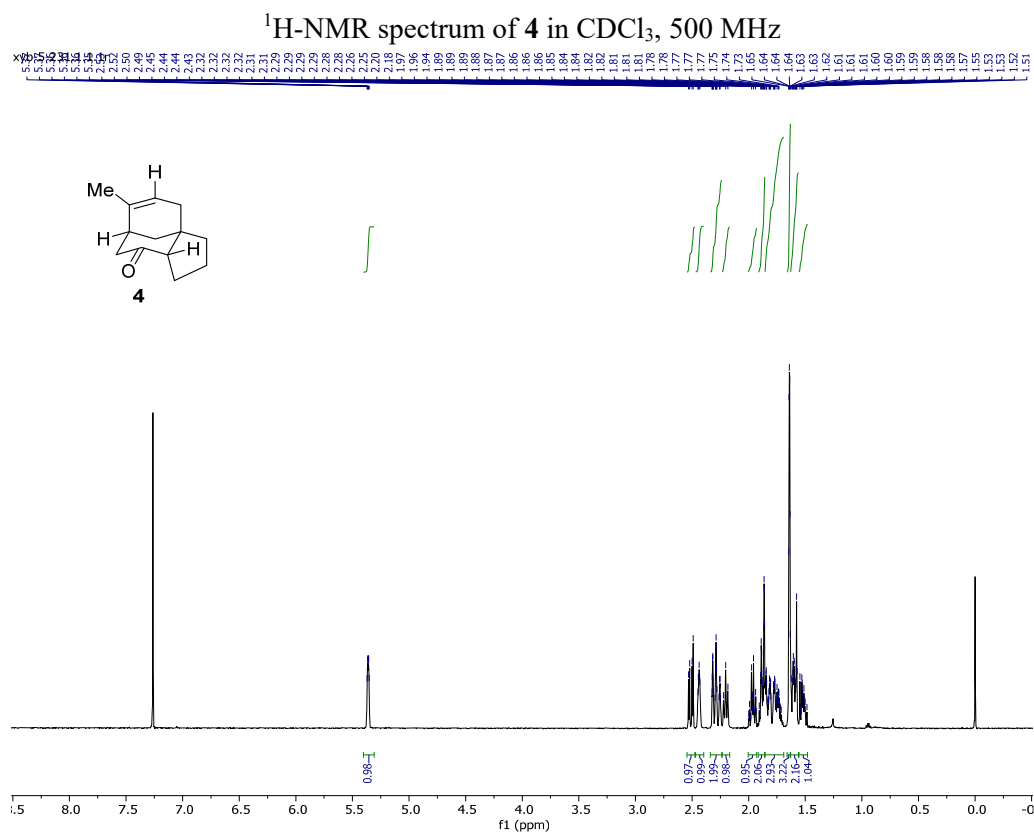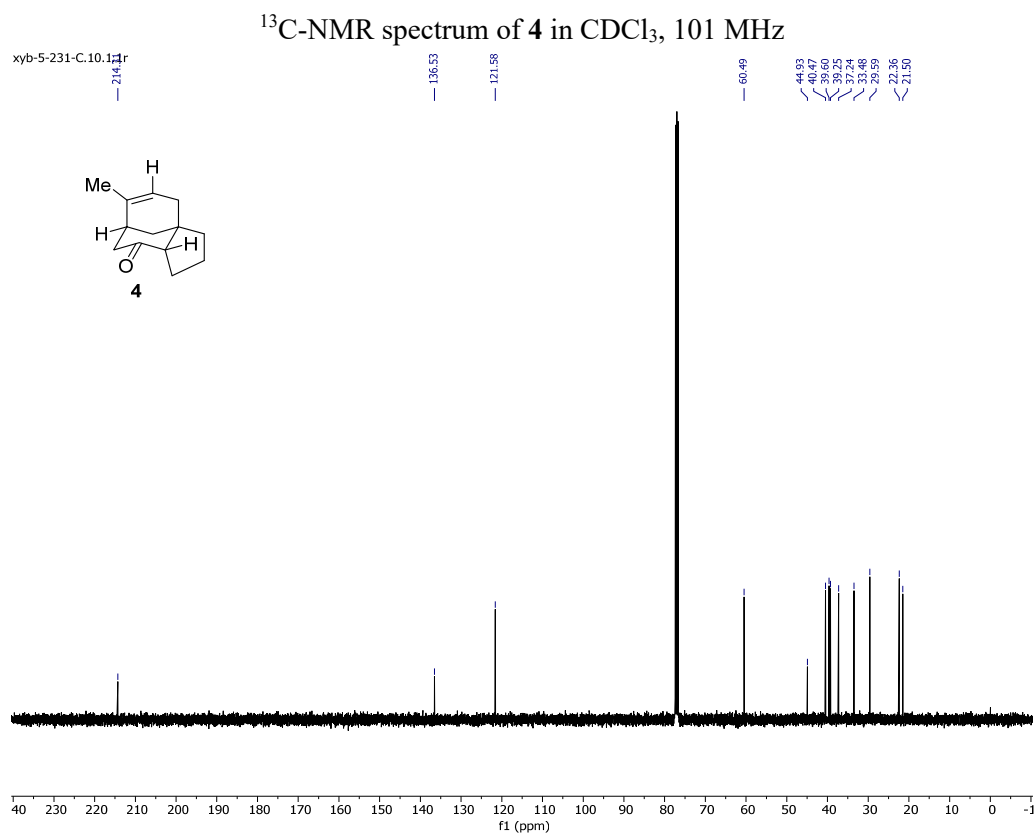

<sup>1</sup>H-NMR spectrum of **13** in CDCl<sub>3</sub>, 500 MHz

xyb-6-46-1.1.1.1r

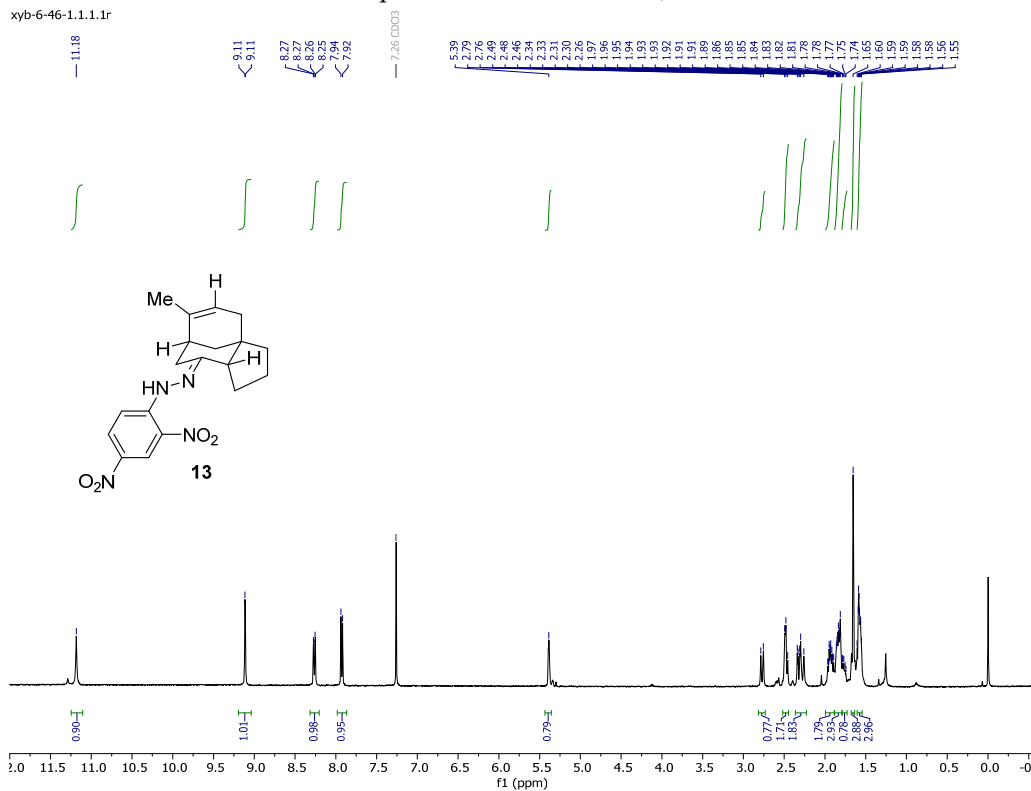

<sup>13</sup>C-NMR spectrum of **13** in CDCl<sub>3</sub>, 101 MHz

xyb-6-46-1-C-2.10.1.1r

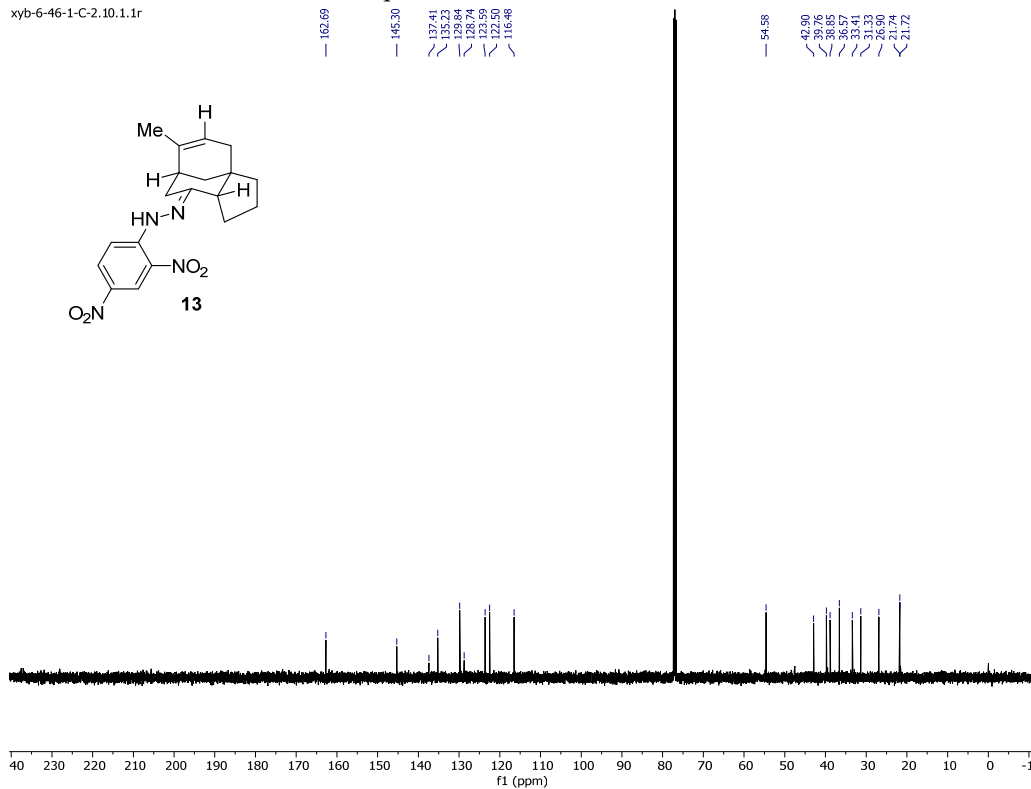







<sup>1</sup>H-NMR spectrum of **15** in CDCl<sub>3</sub>, 500 MHz

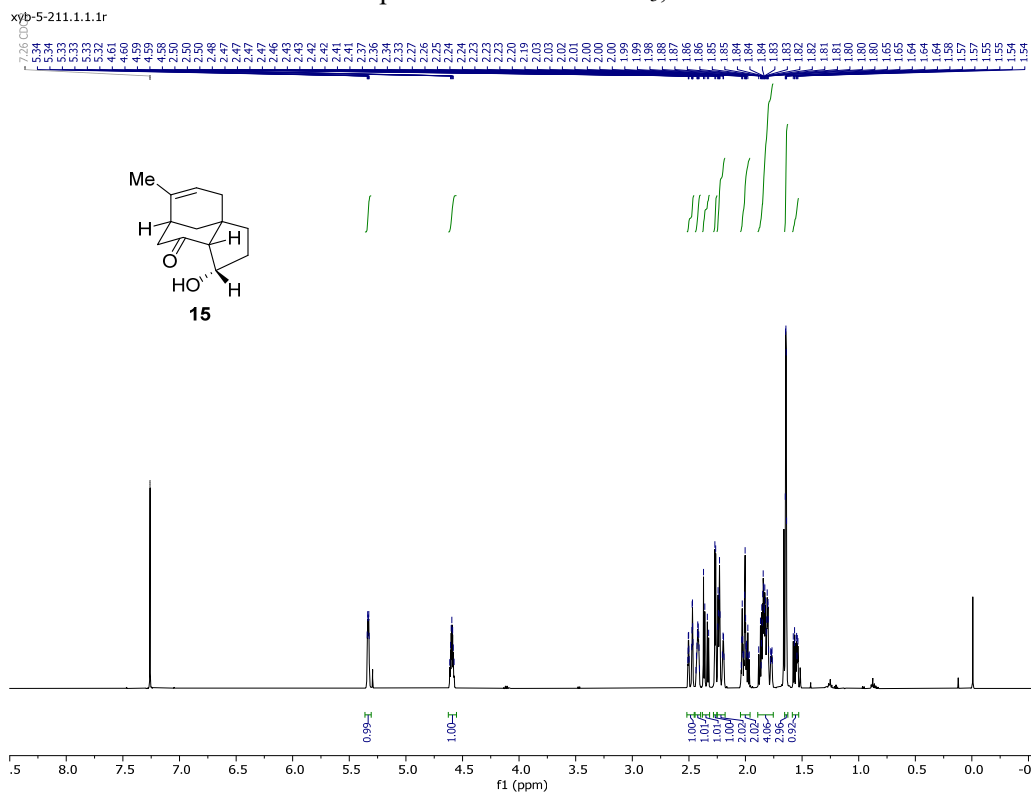

<sup>13</sup>C-NMR spectrum of **15** in CDCl<sub>3</sub>, 101 MHz

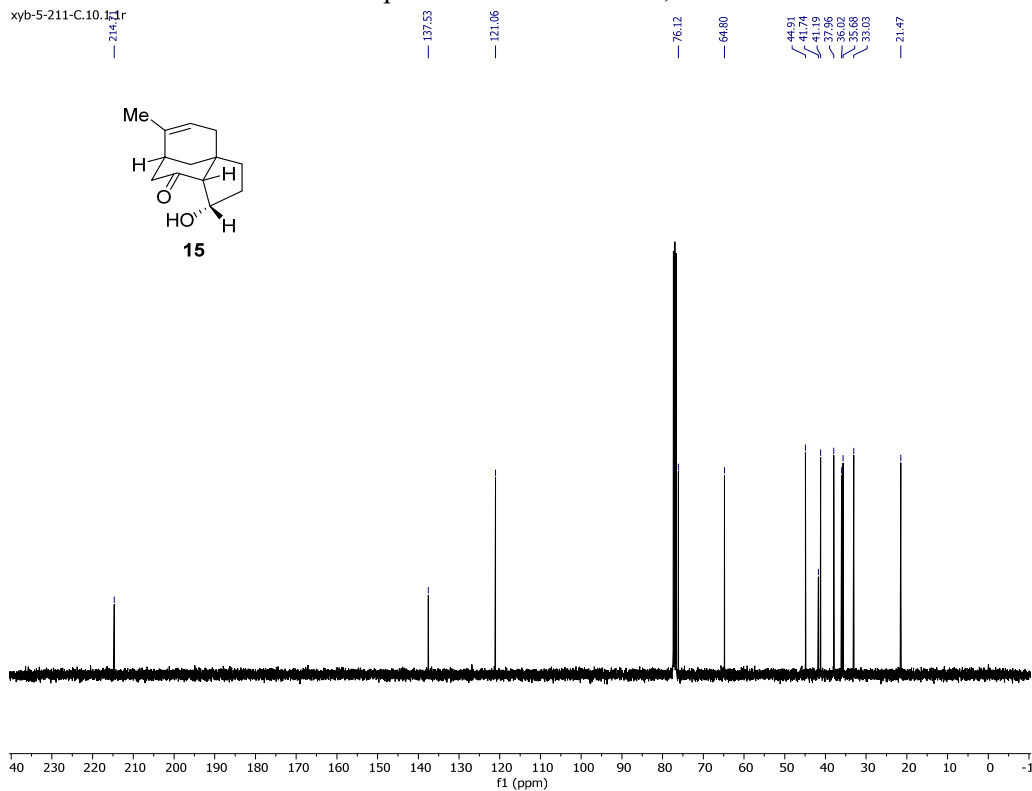



<sup>1</sup>H-NMR spectrum of **3** in CDCl<sub>3</sub>, 500 MHz

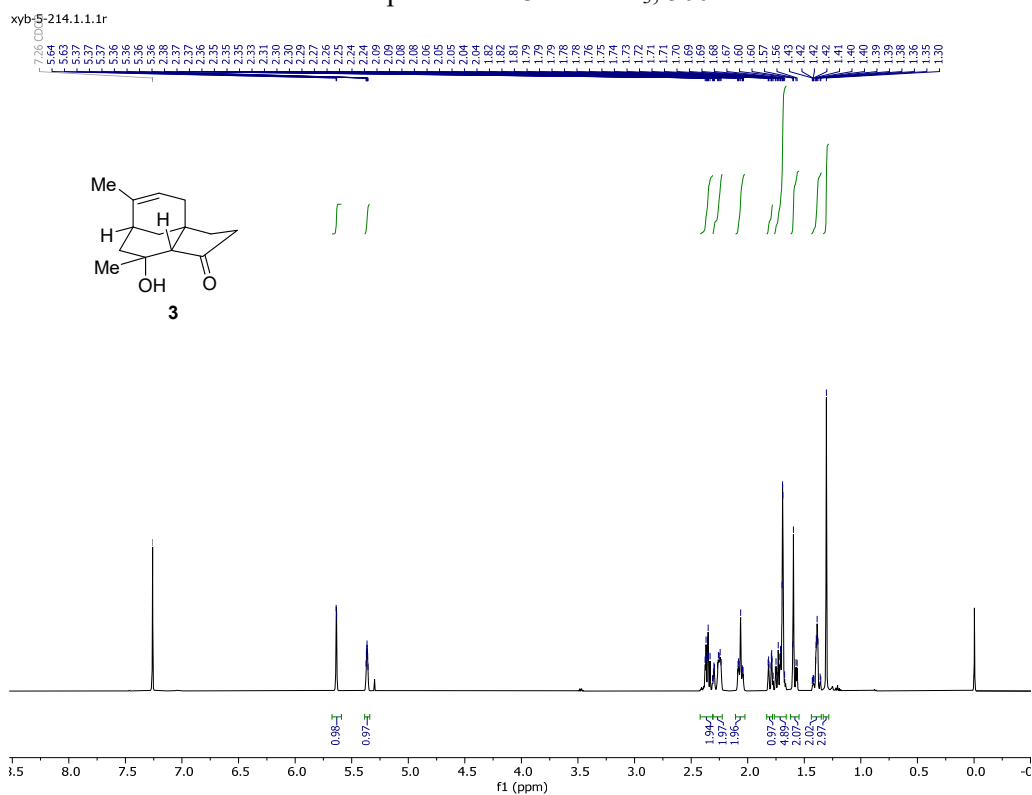

<sup>13</sup>C-NMR spectrum of **3** in CDCl<sub>3</sub>, 101 MHz

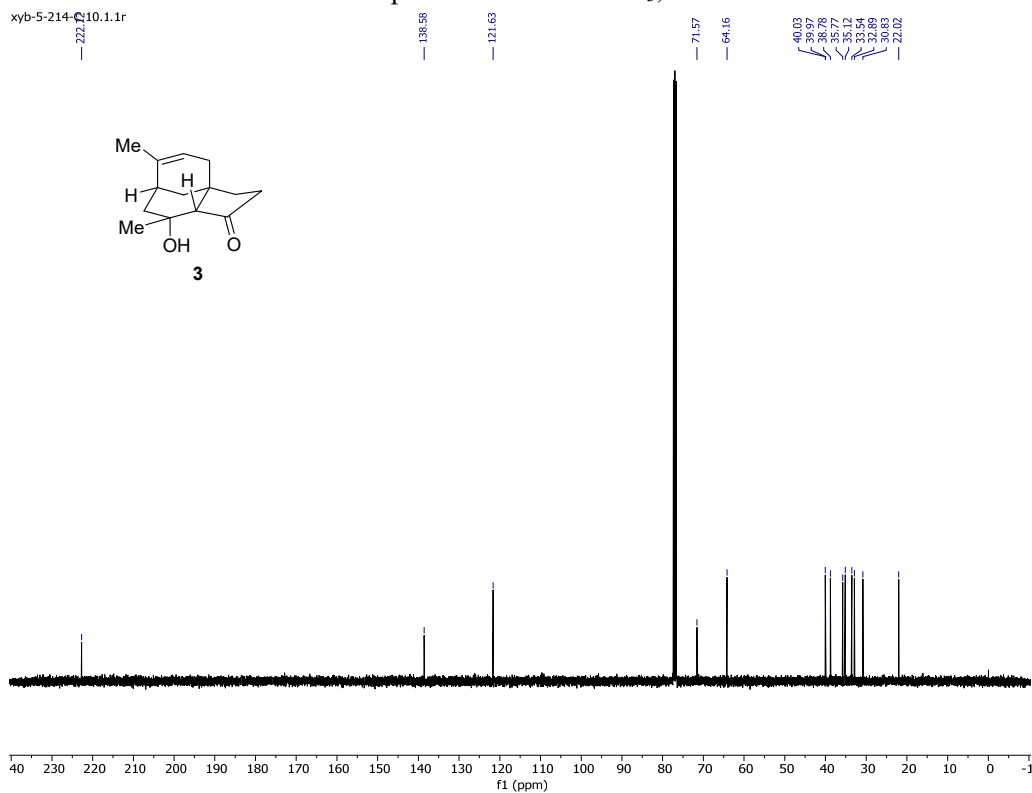

<sup>1</sup>H-NMR spectrum of **17** in CDCl<sub>3</sub>, 500 MHz

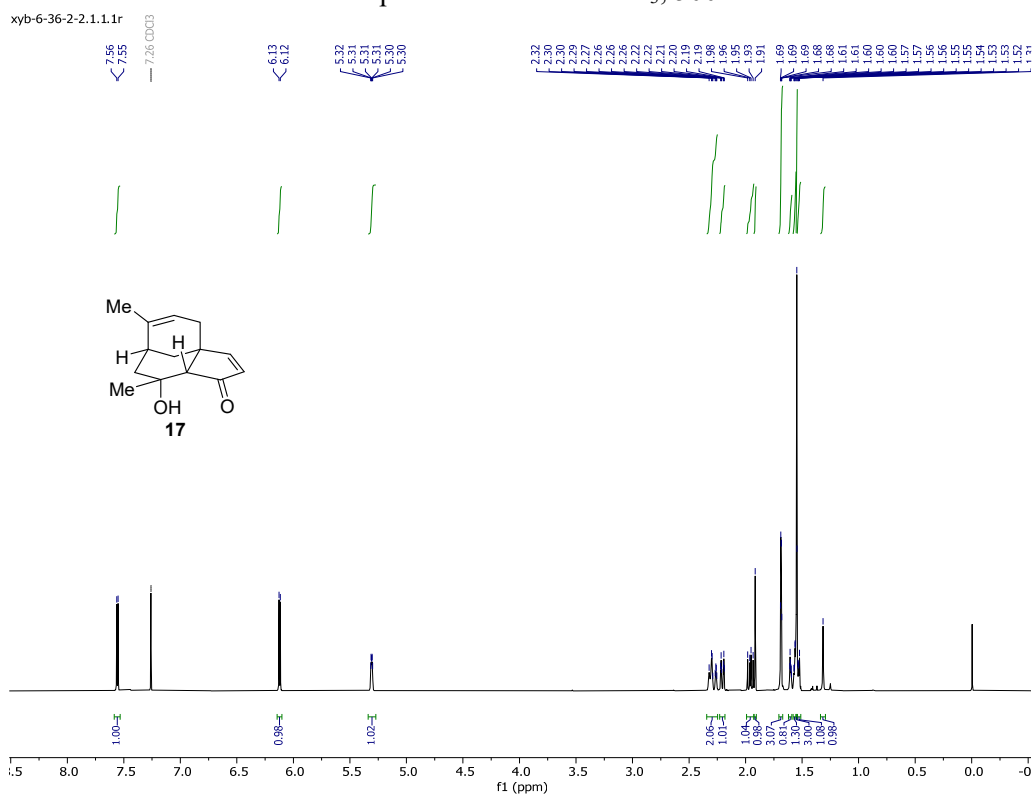

<sup>13</sup>C-NMR spectrum of **17** in CDCl<sub>3</sub>, 101 MHz

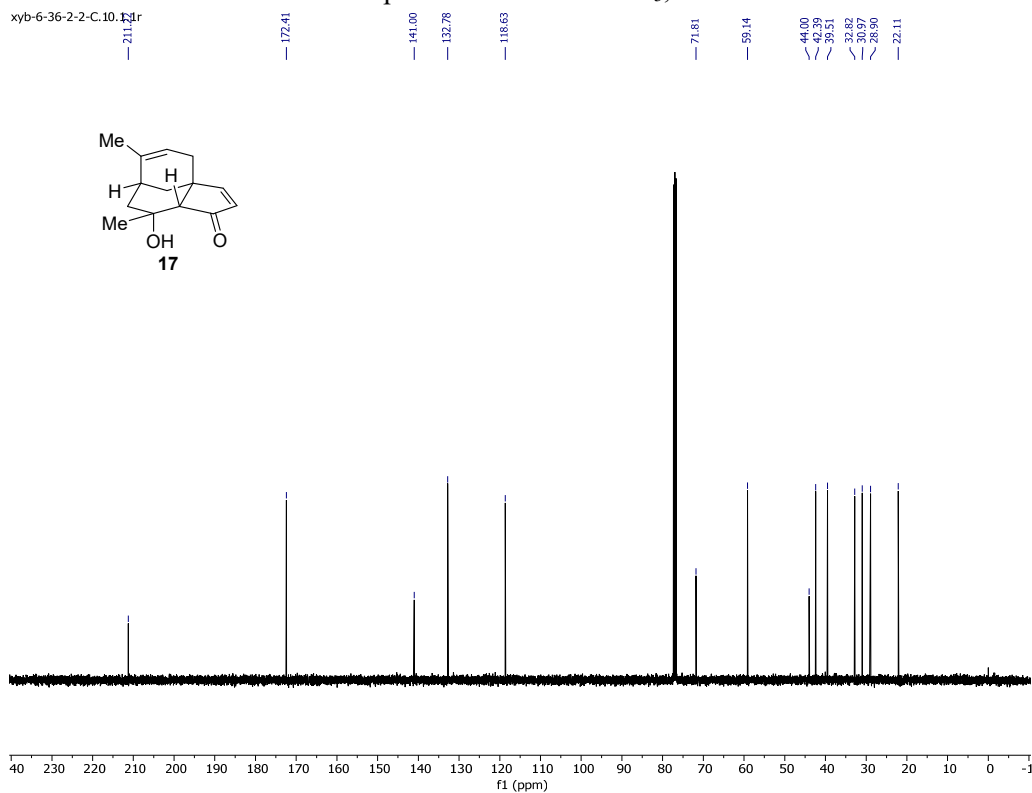

## xyb-6-40.1.1.1r

113

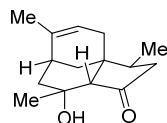

18

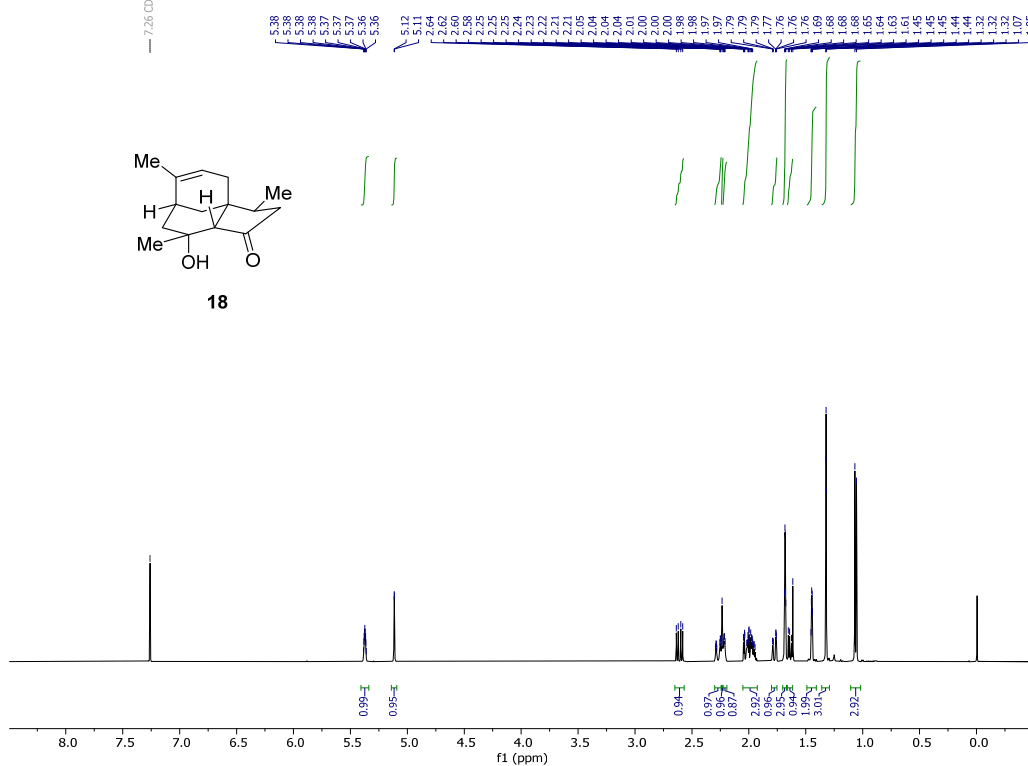

## xyb-6-40-C, 10.1.1r

C.80

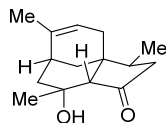

18

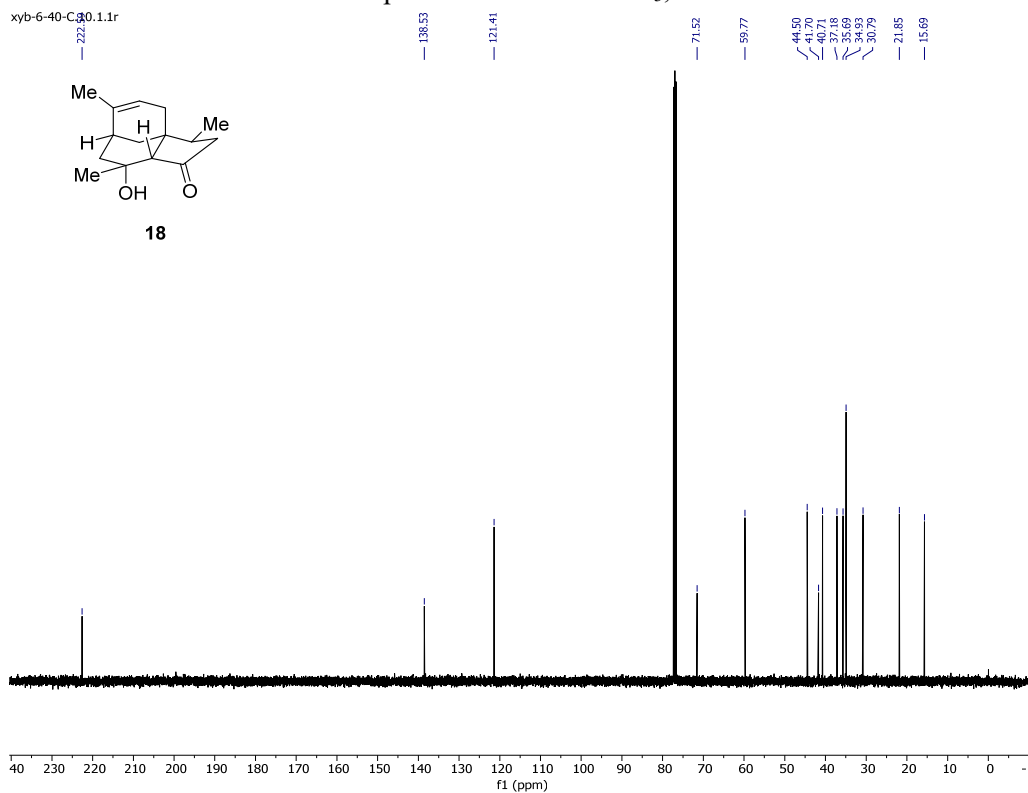

<sup>1</sup>H-NMR spectrum of **1** in acetone-D<sub>6</sub>, 500 MHz

xyb-6-41.1.1.1r

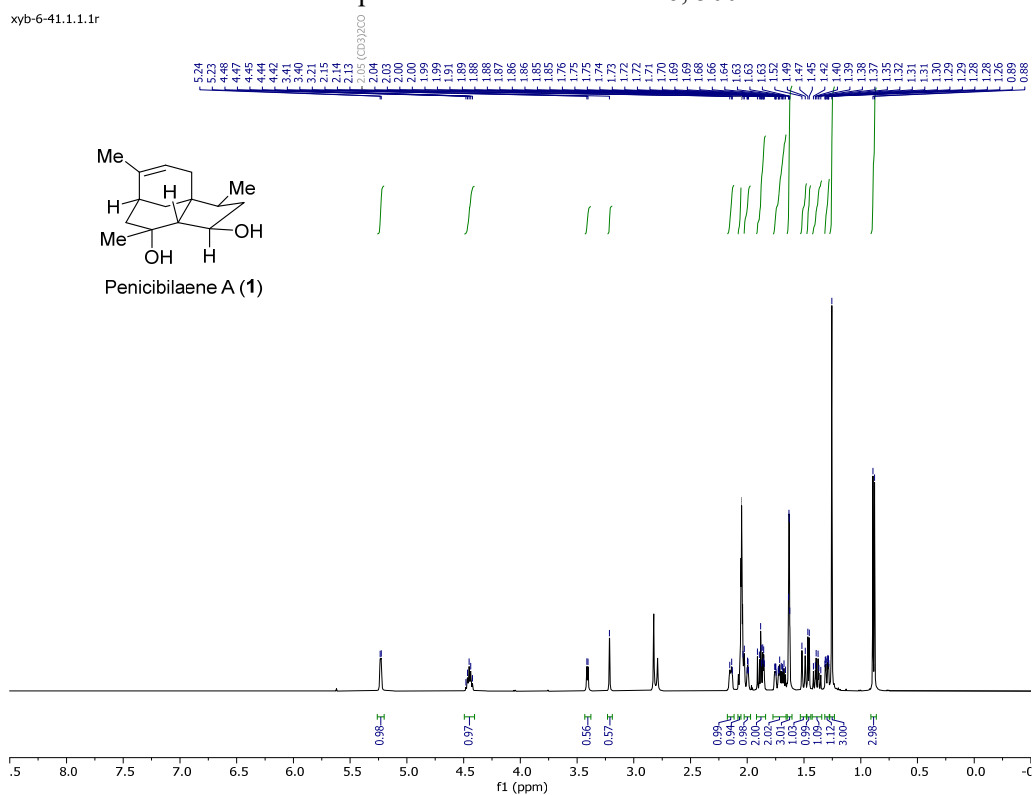

<sup>13</sup>C-NMR spectrum of **1** in acetone-D<sub>6</sub>, 101 MHz

xyb-5-221-C.10.1.1r

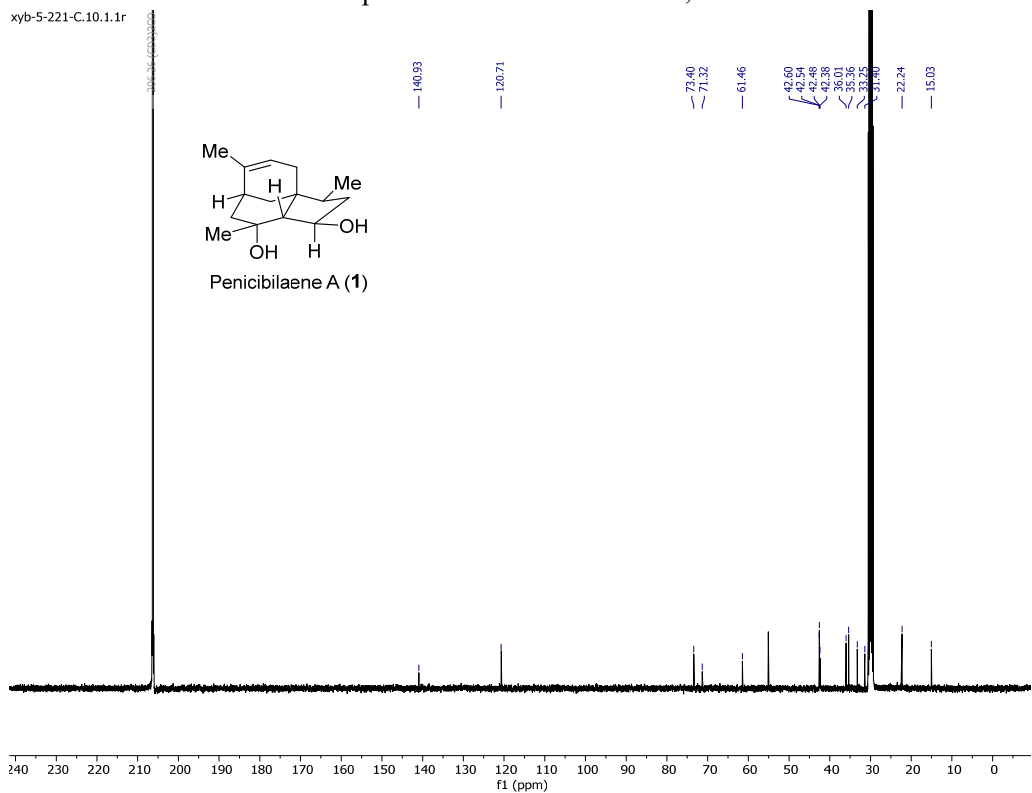



<sup>1</sup>H-NMR spectrum of **2** in CDCl<sub>3</sub>, 500 MHz

xyb-6-43.1.1.1r

7.26 CDCl<sub>3</sub>

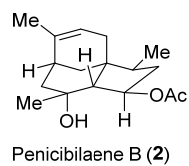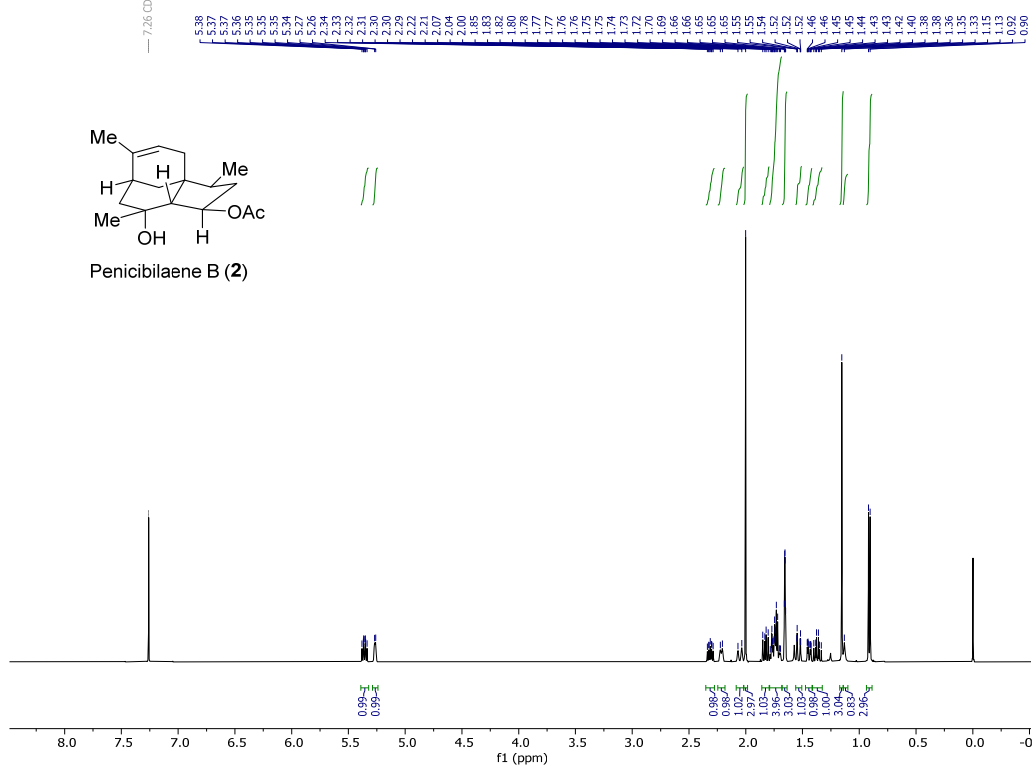

<sup>13</sup>C-NMR spectrum of **2** in CDCl<sub>3</sub>, 101 MHz

xyb-6-43-C.10.1.1r

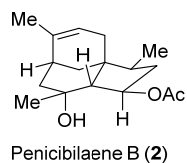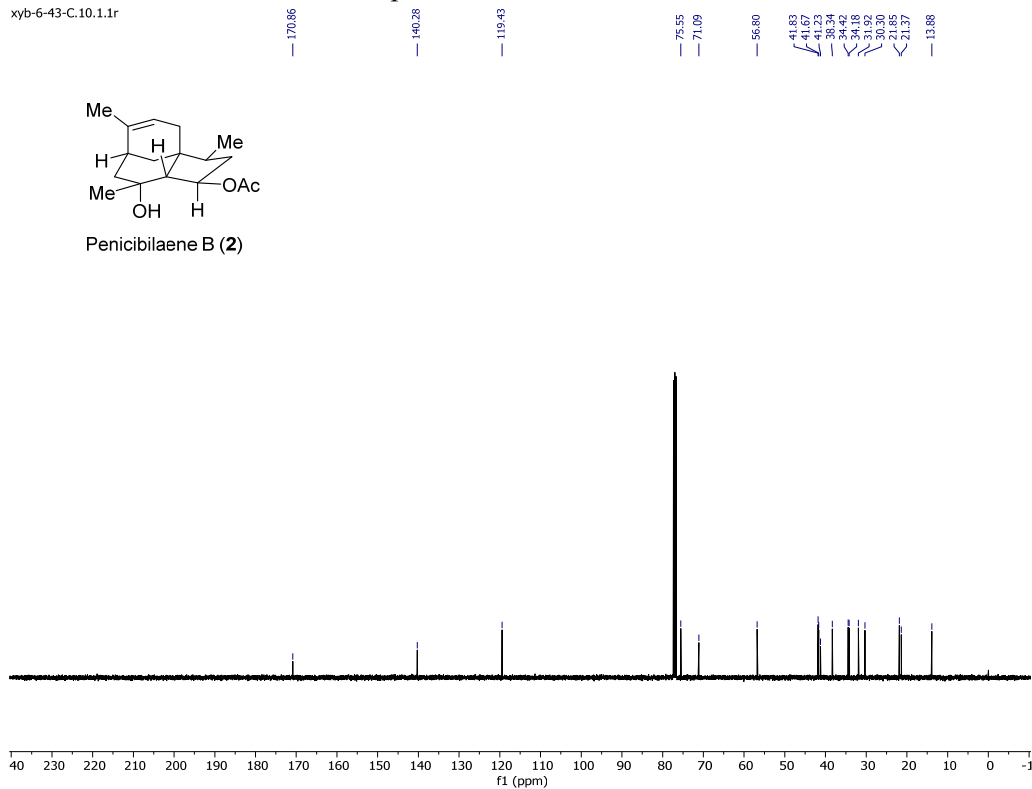



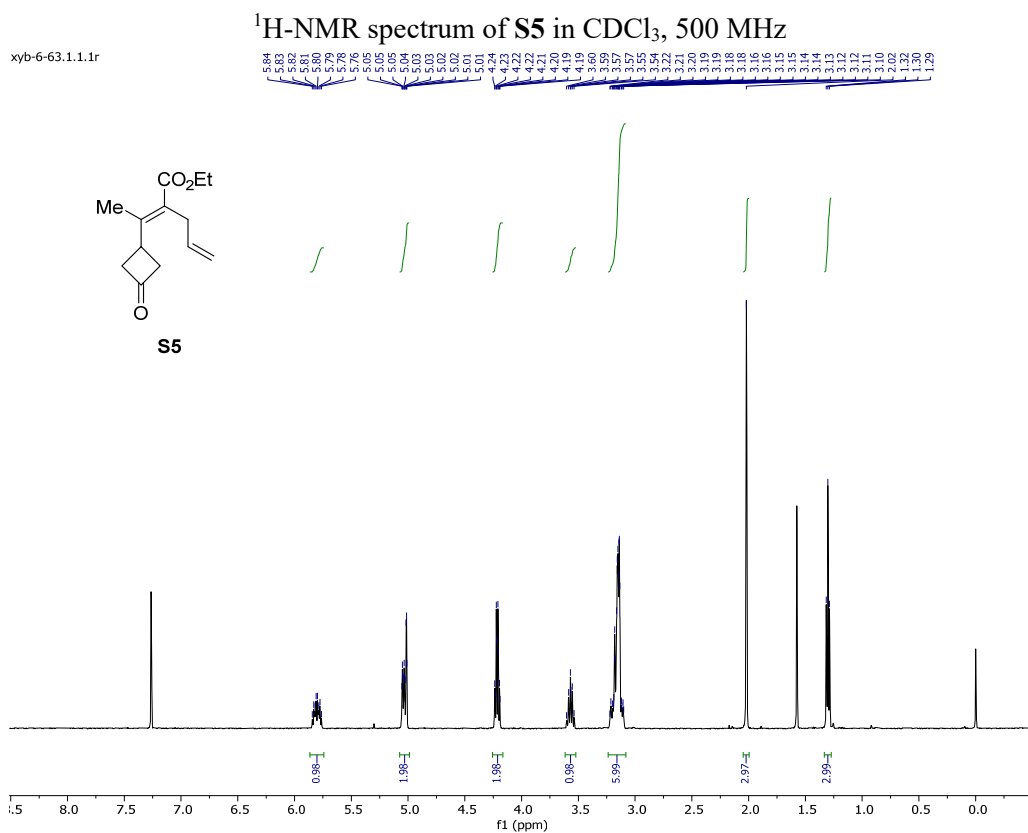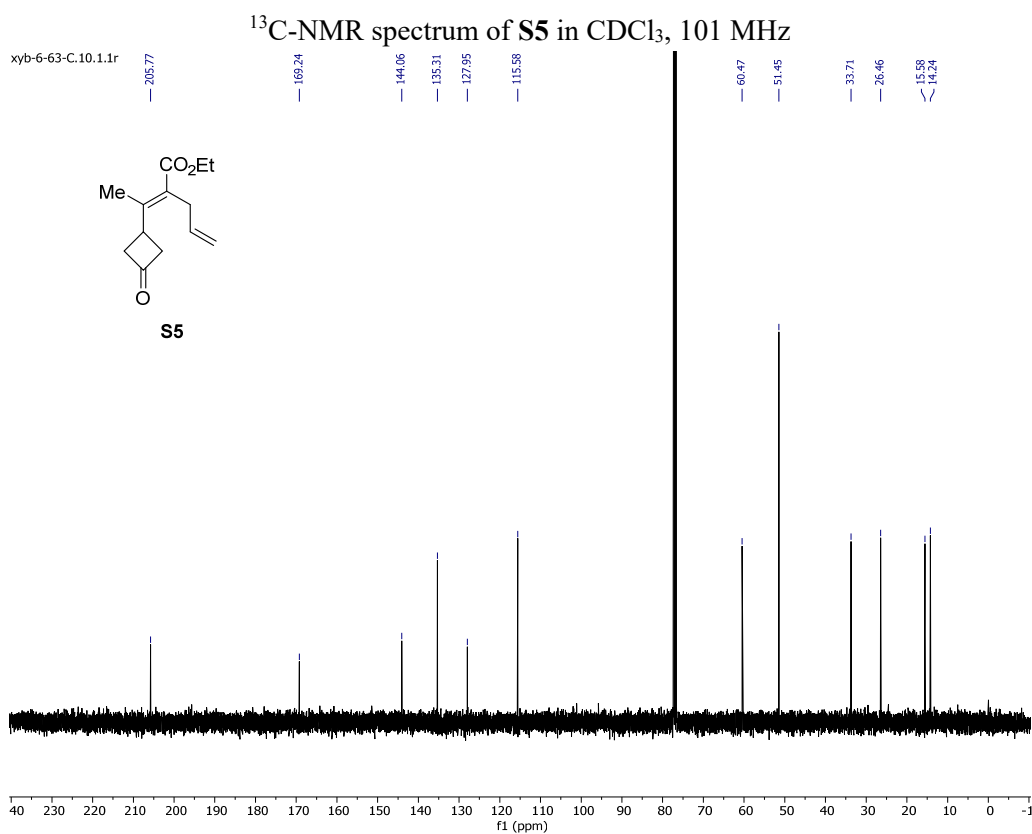

<sup>1</sup>H-NMR spectrum of S6 in CDCl<sub>3</sub>, 500 MHz

xyb-6-66.1.1.1r

— 7.26 CDCl<sub>3</sub>

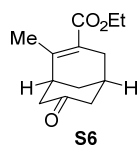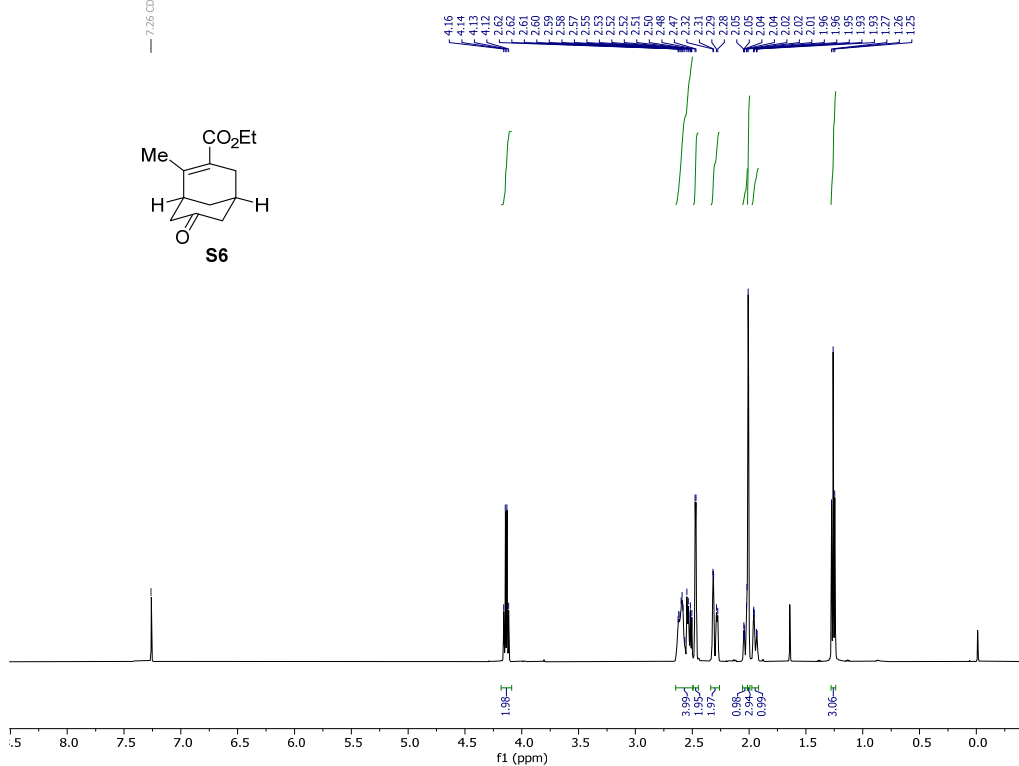

<sup>13</sup>C-NMR spectrum of S6 in CDCl<sub>3</sub>, 101 MHz

xyb-6-66-C.10.1.1r

— 210.13

— 167.99

— 147.47

— 122.93

— 60.09

— 48.74

— 46.72

— 44.52

— 38.91

— 33.59

— 29.75

— 29.25

— 20.85

— 14.21

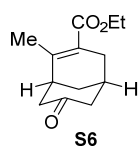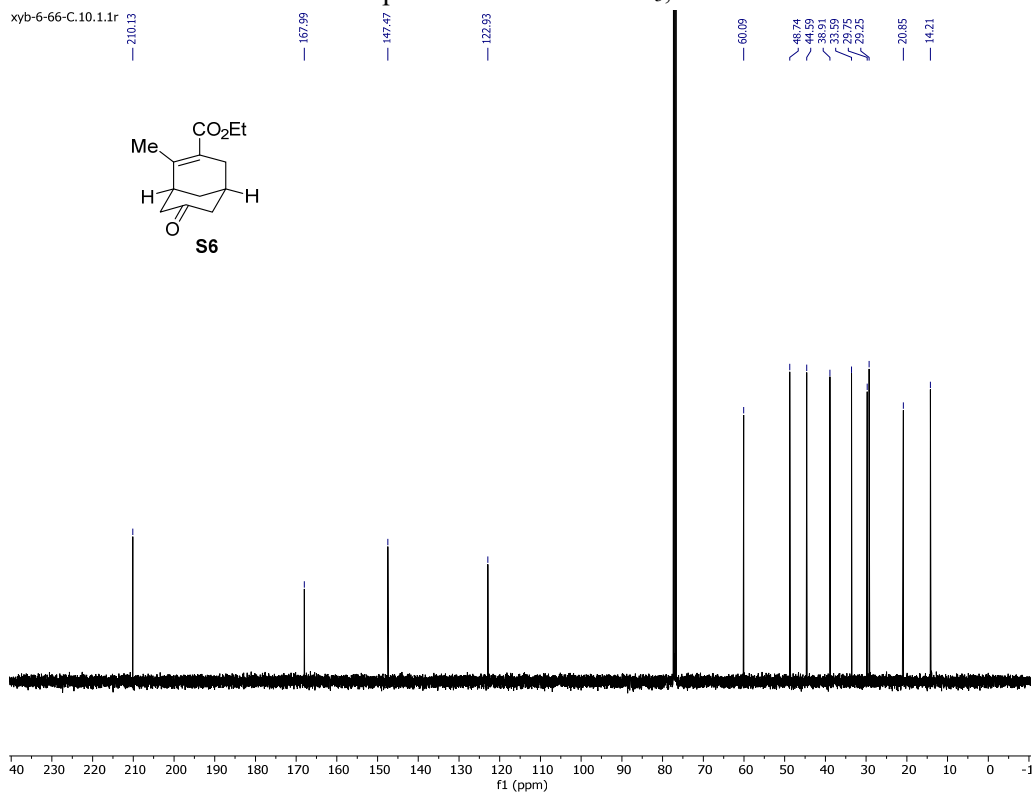

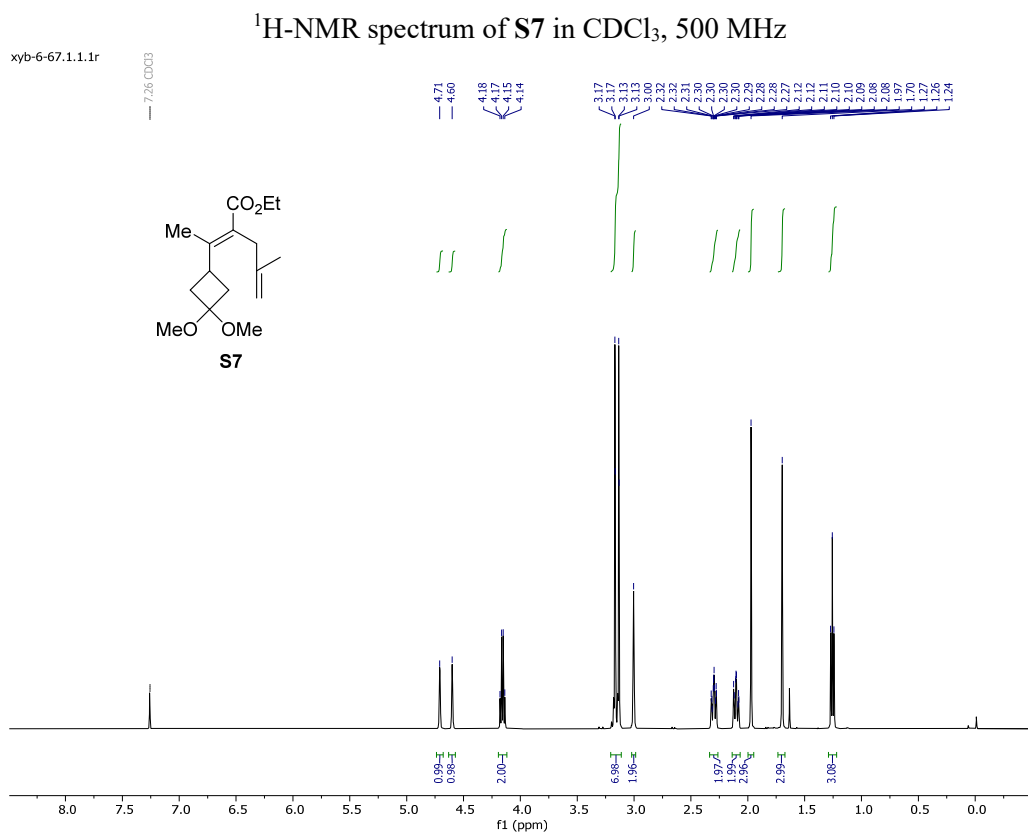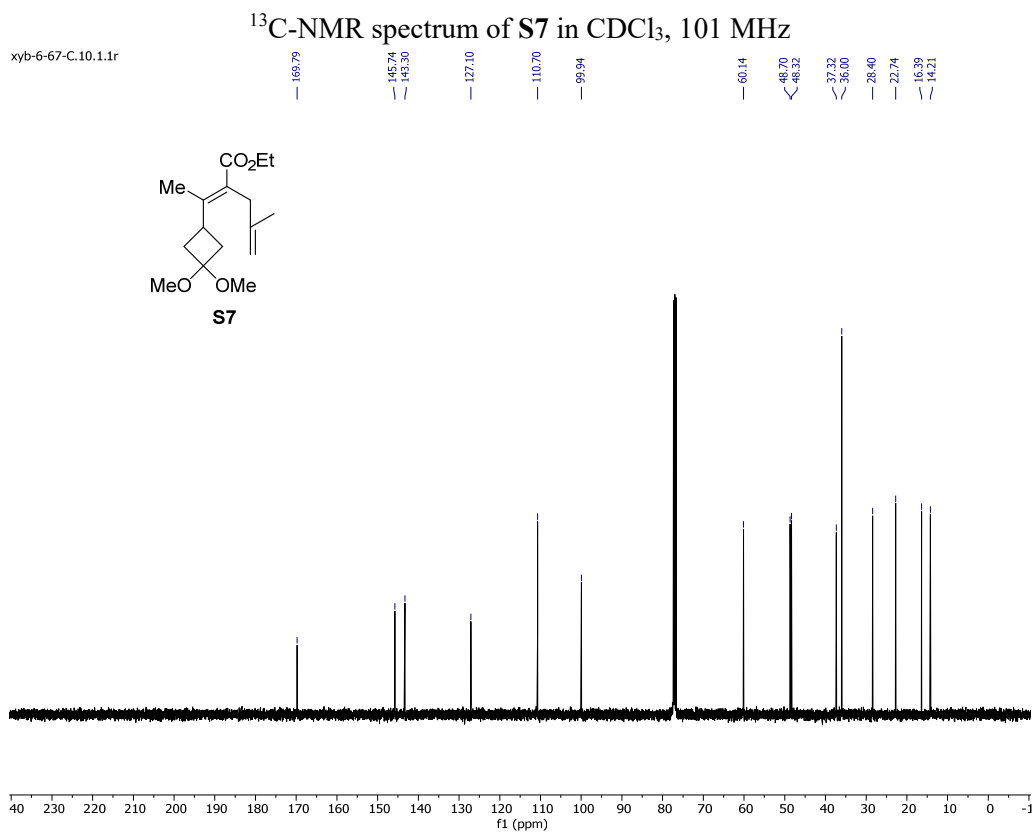

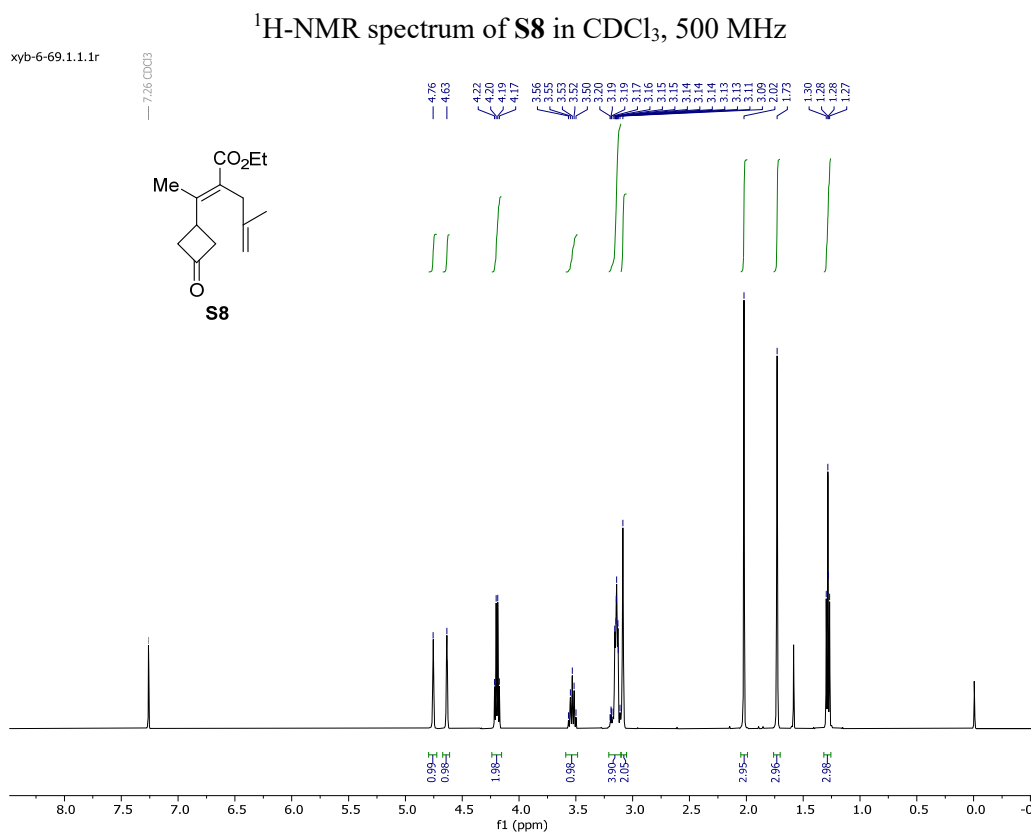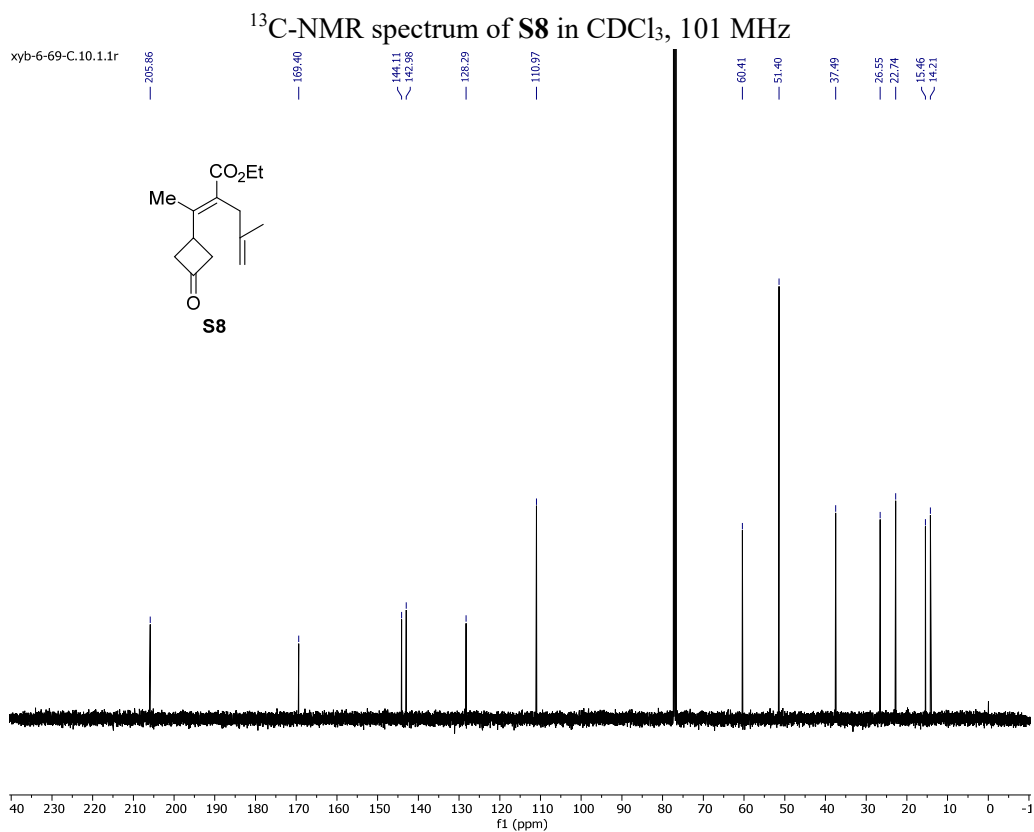

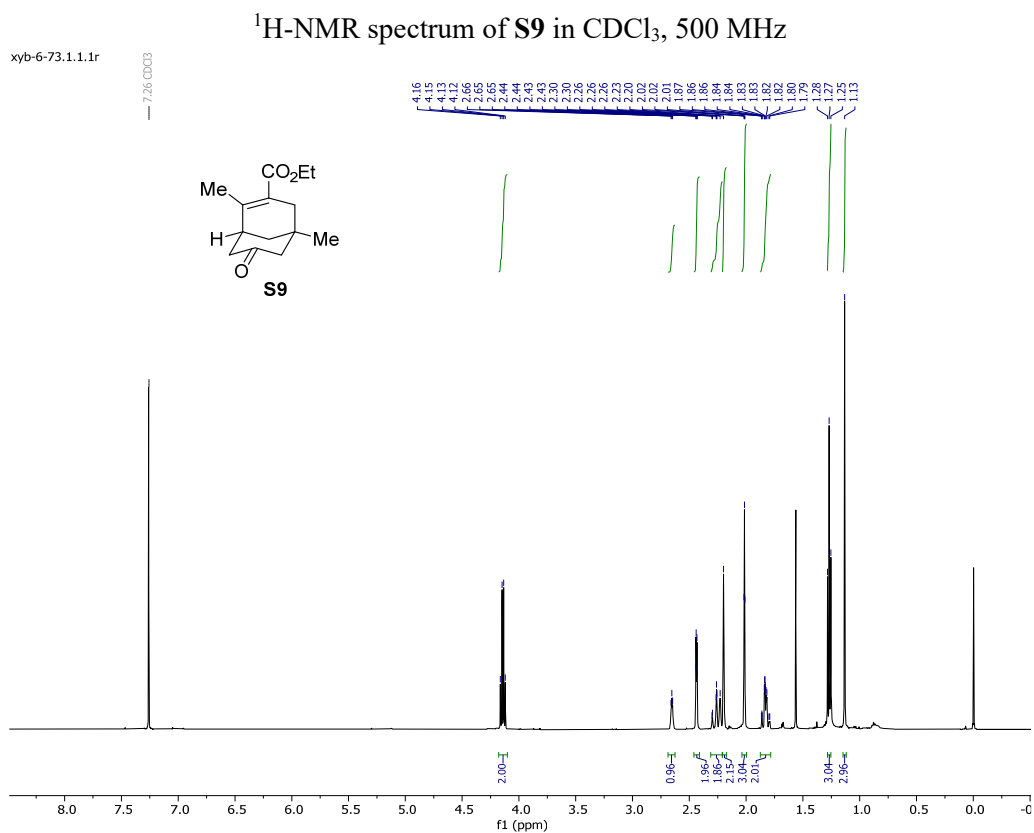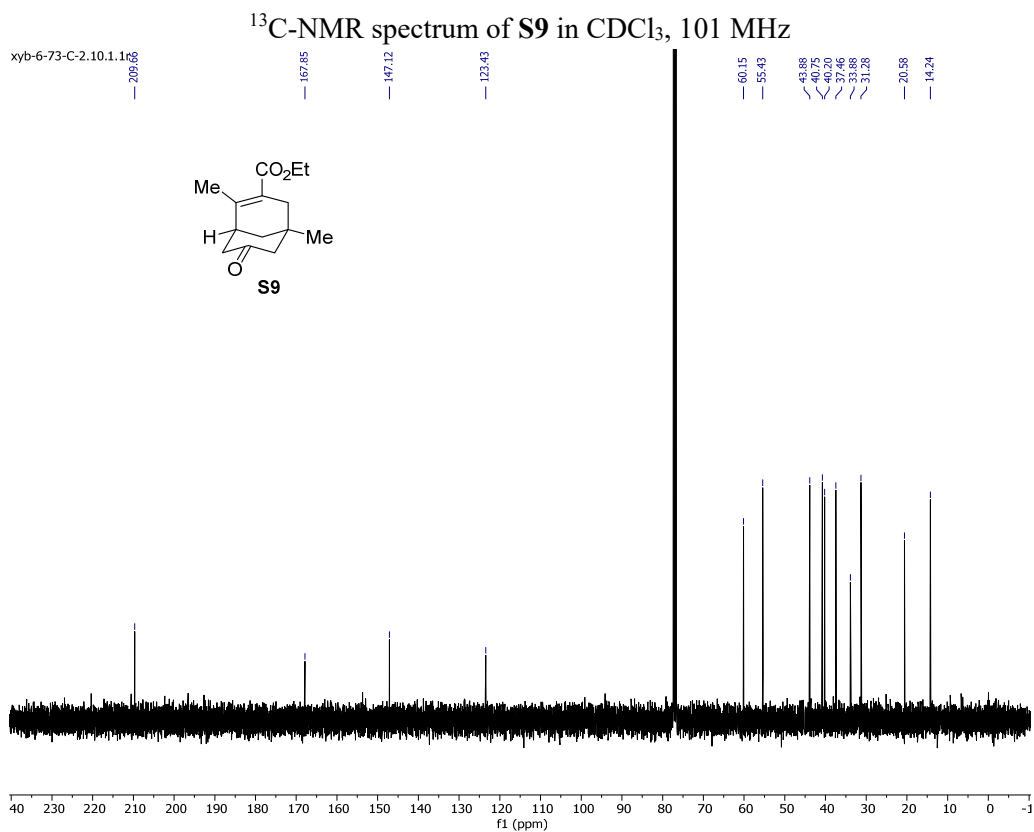

<sup>1</sup>H-NMR spectrum of **DG4** in CDCl<sub>3</sub>, 500 MHz

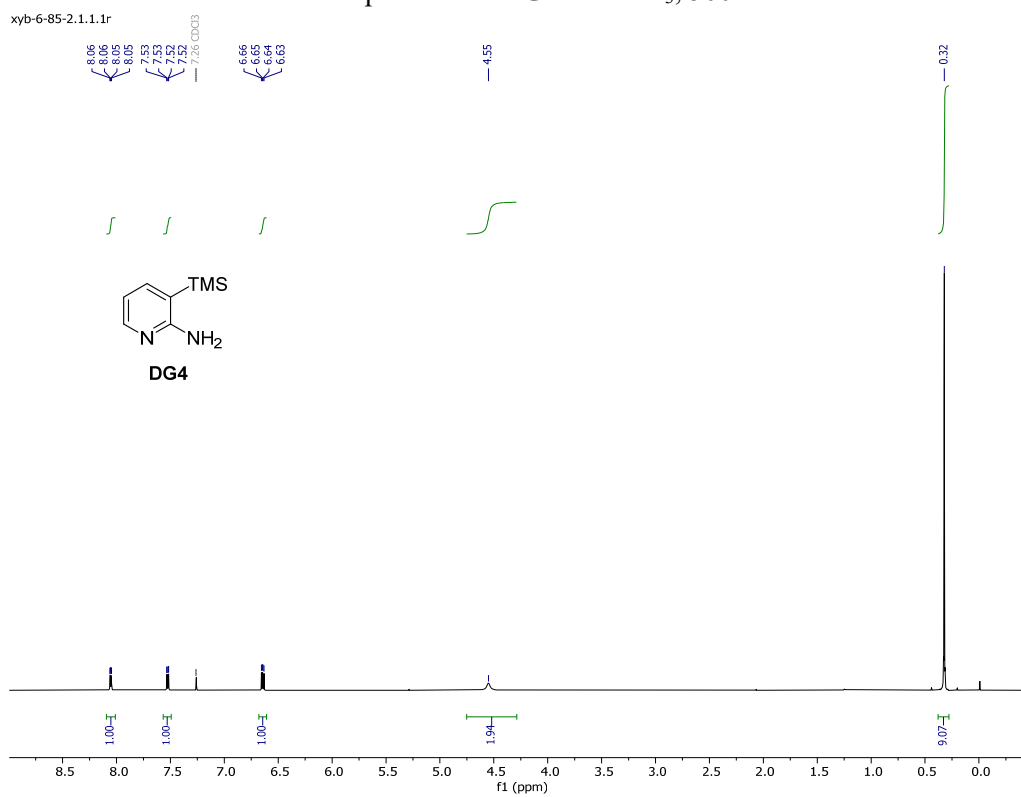

<sup>13</sup>C-NMR spectrum of **DG4** in CDCl<sub>3</sub>, 101 MHz

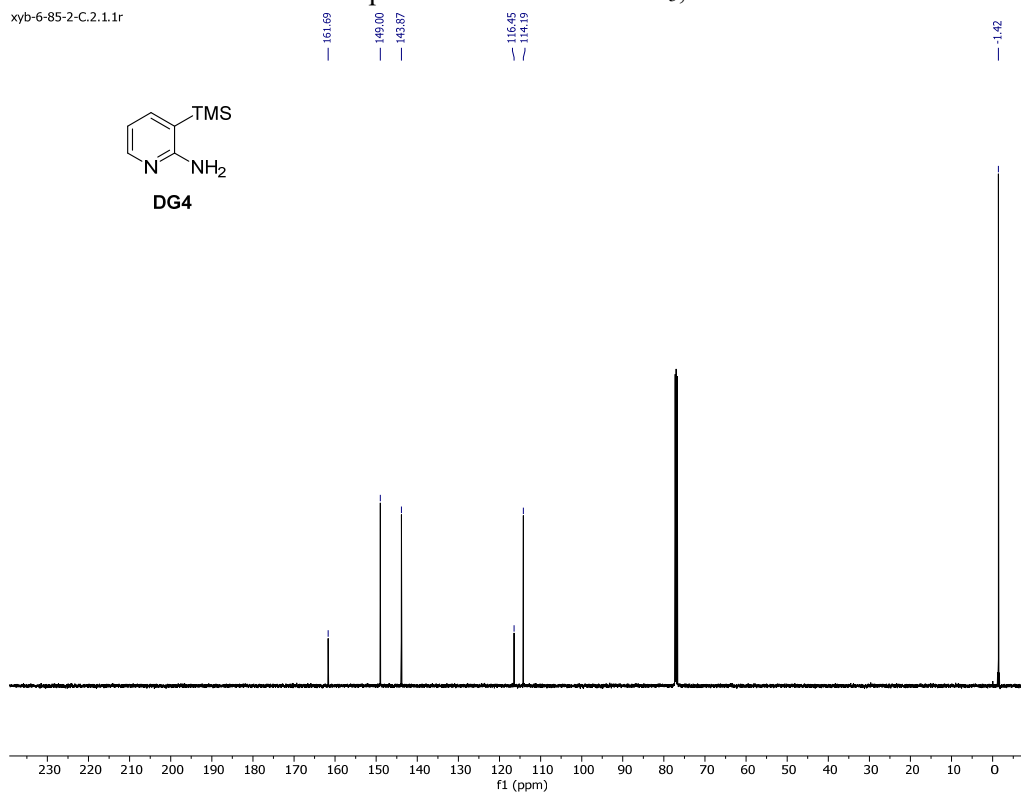



## 9. References

1. Kapat, A.; Nyfeler, E.; Giuffredi, G. T.; Renaud, P. Intramolecular Schmidt Reaction Involving Primary Azidoalcohols under Nonacidic Conditions: Synthesis of Indolizidine (–)-167B. *J. Am. Chem. Soc.* **2009**, *131*, 17746–17747.
2. Kim, D. D.; Lee, S. J.; Beak, P. Asymmetric Lithiation-Substitution Sequences of Substituted Allylamines. *J. Org. Chem.* **2005**, *70*, 5376–5386.
3. Li, X.; Danishefsky, S. J. Cyclobutenone as a Highly Reactive Dienophile: Expanding Upon Diels-Alder Paradigms. *J. Am. Chem. Soc.* **2010**, *132*, 11004–11005.
4. Trost, B. M.; Masters, J. T.; Lumb, J. P.; Fateen, D. Asymmetric Synthesis of Chiral Cycloalkenone Derivatives via Palladium Catalysis. *Chem. Sci.* **2014**, *5*, 1354–1360.
5. Meng, L. H.; Li, X. M.; Liu, Y.; Wang, B. G. Penicibilaenes A and B, Sesquiterpenes with a Tricyclo[6.3.1.0<sup>1,5</sup>]dodecane Skeleton from the Marine Isolate of *Penicillium bilaiae* MA-267. *Org. Lett.* **2014**, *16*, 6052–6055.
